1                    **Longitudinal single-cell chemical imaging of engineered strains reveals**  
2                    **heterogeneity in fatty acid production**

3  
4                    Nathan Tague<sup>1,a,b</sup>, Haonan Lin<sup>1,a,c</sup>, Jean-Baptiste Lugagne<sup>a,b</sup>, Owen M. O'Connor<sup>a,b</sup>,  
5                    Deeya Burman<sup>a</sup>, Wilson W. Wong<sup>a,b</sup>, Ji-Xin Cheng<sup>\*,a,c,d</sup>, Mary J. Dunlop<sup>\*,a,b</sup>

6  
7                    <sup>1</sup> Co-first authors

8                    \* Co-corresponding authors

9  
10                    <sup>a</sup> Department of Biomedical Engineering, Boston University, Boston, MA, USA 02215

11                    <sup>b</sup> Biological Design Center, Boston University, Boston, MA, USA 02215

12                    <sup>c</sup> Photonics Center, Boston University, Boston, MA, USA 02215

13                    <sup>d</sup> Department of Electrical and Computer Engineering, Boston University, Boston, MA, USA  
14                    02215

15  
16                    Mary Dunlop  
17                    44 Cummington Mall  
18                    Boston, Massachusetts 02215  
19                    [mjdunlop@bu.edu](mailto:mjdunlop@bu.edu)  
20                    617-358-6740

21  
22                    Ji-Xin Cheng  
23                    [jxcheng@bu.edu](mailto:jxcheng@bu.edu)  
24

## 25 **Abstract**

26 Understanding metabolic heterogeneity is critical for optimizing microbial production of valuable  
27 chemicals, but requires tools that can quantify metabolites at the single-cell level over time. Here,  
28 we develop longitudinal hyperspectral stimulated Raman scattering (SRS) chemical imaging to  
29 directly visualize free fatty acids in engineered *Escherichia coli* over many cell cycles. We also  
30 develop compositional analysis to determine the chain length and unsaturation of the fatty acids in  
31 living cells. Our method reveals substantial heterogeneity in fatty acid production among and  
32 within colonies that emerges over the course of many generations. Interestingly, the strains display  
33 distinct types of production heterogeneity in an enzyme-dependent manner. By pairing time-lapse  
34 and SRS imaging, we examine the relationship between growth and production at the single-cell  
35 level. Single-cell quantification does not show a significant growth-production tradeoff in a strain  
36 that exhibits high production heterogeneity. Our results demonstrate that cell-to-cell production  
37 heterogeneity is pervasive and provide a means to link single-cell and population-level production.  
38

## 39 **Introduction**

40 Microbial production of chemicals has the potential to provide a sustainable source of products  
41 ranging from fuels to specialty materials (1–4). A major difficulty holding back the replacement  
42 of industrial chemicals with bio-based alternatives is that bioproduction often falls short in terms  
43 of conversion metrics that dictate economic feasibility, such as titer, rate, and yield. Over the past  
44 two decades, researchers have made great strides in identifying metabolic pathways capable of  
45 producing a diverse array of useful chemicals (5). However, the reality is that extensive  
46 engineering and optimization are required for any given chemical to compete as an alternative to  
47 those sourced from petroleum.  
48

49 Producing chemicals in cells offers many advantages, but presents unique industrial challenges.  
50 For example, cell-to-cell variation and genetic mutations can result in production heterogeneity  
51 during fermentation that limits overall process efficiency. Single-cell variation can stem from a  
52 variety of causes, such as stochasticity in the underlying biological processes (6, 7), variations in  
53 media environments within cultures (8), or selection pressures against high producing cells causing  
54 mutational escape variants (9, 10). However, the frequency and impact of production variation and  
55 how it changes over time are largely unknown. Methods that enable quantification of heterogeneity  
56 and its emergence are a prerequisite to understanding the root cause and implementing designs that  
57 mitigate its effect on overall efficiency.  
58

59 Here, we focus on fatty acid synthesis, which is an attractive pathway for metabolic engineering  
60 because it offers a biological means to synthesize linear hydrocarbons. Fatty acids and their  
61 derivatives are high demand chemicals that can be used as fuels, commodities, and specialty  
62 chemicals. Numerous studies have aimed at increasing the efficiency of fatty acid synthesis  
63 pathways as well as controlling the species of fatty acid produced (11–14). Termination enzymes  
64 that interface with this pathway can be used to produce a wide variety of high-value fatty acid  
65 derivatives such as alkanes, olefins, and alcohols (15).  
66

67 Current methods to measure production strain performance include mass spectrometry, fluorescent  
68 biosensors, and dyes. Mass spectrometry-based techniques provide exquisite chemical specificity  
69 but are limited in their ability to quantify single cells, which means they can overlook valuable  
70 information about population heterogeneity that is key to predicting population stability during

71 scale-up (16–18). Further, because the measurement process is destructive, it is not possible to  
72 follow production changes within the same cells over time. Biosensor-based fluorescent assays, in  
73 contrast, can capture dynamic, single-cell information. These systems are amenable to high  
74 throughput screens and are non-destructive (19). However, well-characterized biosensors are  
75 scarce in comparison to the number of chemicals metabolic engineers can produce. Additionally,  
76 significant optimization is often necessary to fine tune the concentration responsive range of a  
77 biosensor (20–22). In the case of fatty acid production, lipophilic dyes such as Nile red have been  
78 used to measure production (23), however these stains lack lipid specificity. Further, both  
79 biosensor and dye-based measurements are indirect readouts of chemical production.

80  
81 Given the drawbacks of current screening methods, we sought to develop an alternative approach  
82 that can capture production and composition information in single cells over time. Stimulated  
83 Raman scattering (SRS) is an ideal candidate, as it is a non-destructive, label-free vibrational  
84 spectroscopic imaging method that directly detects chemical compounds based on intrinsic  
85 molecular vibrations (24, 25). The ability of SRS to probe metabolic activities in live cells has  
86 been demonstrated on microalgae (26) and mammalian cells (27) for short periods of time.  
87 Although SRS imaging of industrially relevant microbes such as *E. coli* has been reported (28, 29),  
88 its use has been limited to conditions where cells were either fixed or where only a single timepoint  
89 was required. Performing longitudinal SRS for compositional chemical imaging on live microbes  
90 remains challenging. This is mainly attributed to their small size (e.g. *E. coli* are 1–2  $\mu\text{m}$  in length),  
91 which shortens the axial signal integration length, and thus yields weaker SRS signals compared  
92 to larger cells. In the context of metabolic engineering, where compositional information on  
93 products is critical, one needs to perform hyperspectral SRS to generate pixel-wise Raman spectra  
94 for molecular fingerprinting. However, due to significant spectral overlaps between metabolites,  
95 especially in the carbon-hydrogen (C-H) region, existing hyperspectral SRS image processing  
96 methods only provide unsaturation levels of fatty acids (30). They also fail to deliver information  
97 on chain length, which is equally important for free fatty acid synthesis.

98  
99 Here, we introduce a longitudinal hyperspectral SRS method to study metabolically engineered *E.*  
100 *coli*, monitoring free fatty acid production and composition in live cells. We perform SRS in the  
101 C-H region which maximizes SRS signals. To overcome spectral cross-talk in the region, we  
102 develop a hyperspectral image analysis technique that generates chain length and unsaturation  
103 level predictions, allowing for chemical readouts that are analogous to GC-MS. First, we  
104 demonstrate that we can clearly distinguish fatty acid production strains from wild type *E. coli* by  
105 deconstructing images into maps of their chemical components. With the ability to measure  
106 production at the single-cell level, we examine heterogeneity in fatty acid production strains and  
107 observe both colony-level heterogeneity and substantial cell-to-cell differences in production. We  
108 optimize imaging parameters to enable longitudinal hyperspectral SRS imaging to capture fatty  
109 acid production over time in growing cells. Next, we use longitudinal measurements to  
110 demonstrate dynamic differences in fatty acid production and composition within the same strain.  
111 To the best of our knowledge, this is the first demonstration of longitudinal hyperspectral SRS  
112 imaging of live cells over many cell cycles. Lastly, we pair SRS microscopy with time-lapse phase  
113 contrast microscopy and automated segmentation analysis to examine relationships between  
114 production and growth.

115

116 Overall, our study presents two important advances of SRS microscopy, namely fatty acid chain  
117 length extraction and longitudinal imaging of proliferating cells. Upon these advances, we report  
118 discoveries of metabolic heterogeneity among different cells in a colony and temporal  
119 heterogeneity throughout colony formation.

120

## 121 Results

122

### 123 Hyperspectral SRS imaging of fatty acid production strains

124 Spectral signals from Raman scattering correspond to vibrational energies of covalent bonds. This  
125 allows for direct imaging of chemicals without the need for labels such as fluorescent reporters or  
126 dyes. Here, we deploy hyperspectral SRS (31–33) to obtain chemical maps of protein and fatty  
127 acids. To achieve this, we chirp two broadband femtosecond laser beams (pump and Stokes) using  
128 high-dispersion glass rods, producing linear temporal separation of the frequency components (Fig.  
129 1a, Fig. S1). The beating frequency of the two beams is linearly correlated with the temporal delay  
130 between the two laser pulses. Using a two-dimensional galvo scanner, the combined laser beam is  
131 moved across the x and y dimensions of the sample to generate an image. This process is then  
132 repeated for a range of temporal delays, each of which produces a different wavenumber,  
133 ultimately producing a hyperspectral SRS image generated in a frame-by-frame manner. The  
134 spectral region surrounding the  $2900\text{ cm}^{-1}$  wavenumber is typically referred to as the ‘C-H region’  
135 and has a strong SRS signal. Biomolecules such as proteins and fatty acids, which contain many  
136 C-H bonds, show high Raman signal in this region. Importantly, SRS intensity scales linearly with  
137 molecular concentrations. The strong signal in the C-H region enables high fidelity SRS imaging  
138 with low optical powers that are compatible with live-cell imaging. Thus, this configuration can  
139 be used to acquire longitudinal images of live cells, resulting in data across four dimensions: space  
140 (x and y), wavenumber, and time. We set out to utilize SRS chemical imaging in the C-H region  
141 to measure fatty acid production in metabolically engineered strains of *E. coli*.

142

143 Previous metabolic engineering efforts have focused on producing free fatty acids in *E. coli* using  
144 the native type II fatty acid synthesis pathway (14, 20, 34). Introducing a heterologously expressed  
145 acyl-acyl carrier protein (ACP) thioesterase can catalyze the formation and pooling of free fatty  
146 acids from elongating acyl hydrocarbon chains that would otherwise be incorporated into  
147 membrane phospholipids (35, 36) (Fig. 1b). We reasoned that SRS imaging could effectively  
148 capture fatty acid in production strains due to the C-H-rich carbon chains present in fatty acids. To  
149 test this hypothesis, we studied several production strains that were previously engineered to  
150 produce high quantities of free fatty acids (Tables 1 and 2). We first focused on the strain *AbTE\**,  
151 which expresses an acyl-ACP thioesterase from *Acinetobacter baylyi*, carrying G17R/A165R  
152 mutations that improve enzymatic activity in *E. coli* (37). SRS images of *AbTE\** show increased  
153 fatty acid production relative to the wild type strain, as evidenced by differences in both the  
154 chemical spectra and visible fatty acid droplets around the cells (Fig. 1c). Using spectral standards,  
155 SRS images can be decomposed into their major chemical components to produce chemical maps  
156 (Fig. 1d). We used standard spectra from pure protein (Bovine serum albumin, BSA), saturated  
157 fatty acids (C10:0 and C16:0), and unsaturated fatty acids (C16:1) to decompose the hyperspectral  
158 image (Fig. S2). To achieve this, we used a least absolute shrinkage and selection operator  
159 (LASSO) linear unmixing analysis to separate the hyperspectral image into its chemical  
160 components (Methods). This results in two dimensional chemical maps for protein and fatty acid  
161 components. Protein levels were comparable between wild type and *AbTE\** strains, with slightly

162 elevated levels in the engineered strain. In contrast, the fatty acid signal in the *AbTE\** strain was  
163 significantly stronger than in wild type. Wild type cells contain membrane phospholipids, however  
164 these signals are much weaker than those recorded in the *AbTE\** strain (Fig. S3). It should be noted  
165 that these strains were sampled from liquid culture, where free fatty acids are secreted and can  
166 aggregate in the media. As a consequence, the large fatty acid drops are not necessarily produced  
167 by the cells within the field of view, but could be an aggregate of fatty acid produced from many  
168 cells in the liquid culture. In subsequent studies we address this by growing cells on agarose pads  
169 to allow for affiliation of cells and the fatty acids they produce, however snapshots from liquid  
170 culture provide a view into the aggregate production.

### 171 172 **Characterization of enzymatic specificity, chain length distribution, and degree of** 173 **unsaturation**

174 Analytical chemistry methods such as GC-MS are typically employed to measure chemical  
175 production because they offer precise chemical specificity information. For fatty acid  
176 quantification, gas chromatography effectively separates fatty acid esters based on chain length  
177 and, along with mass/charge spectra, can specifically read out fatty acid ester chain length and  
178 unsaturated bonds. From a metabolic engineering perspective, quantification of a fatty acid  
179 production strain's chain length distribution and level of unsaturation are critical. For biofuel  
180 purposes, chain length and termination chemistry can be tuned to mimic characteristics of fuel  
181 sources such as gasoline, diesel, or jet fuel (38). Alternatively, medium chain fatty acids (C8-C12)  
182 and their derivatives can be sources of many specialty chemicals (39). With these end point  
183 applications in mind, we sought to extend SRS imaging capabilities to capture the specific profiles  
184 of free fatty acid production strains.

185  
186 Although pure fatty acids of different chain lengths have different spectra in the C-H region, they  
187 are too similar to accurately decompose using spectral unmixing with LASSO linear regression  
188 analysis. However, we expanded our analysis methodology to take advantage of spectral windows  
189 that correspond to CH<sub>2</sub> or CH<sub>3</sub> bonds, which are present in the 2832-2888 cm<sup>-1</sup> and 2909-2967 cm<sup>-1</sup>  
190 wavenumber regions, respectively (40). Since a saturated fatty acid has an increasing number of  
191 CH<sub>2</sub> bonds as the chain length increases, but the terminal CH<sub>3</sub> bond number is constant, we  
192 reasoned that the ratio of the CH<sub>2</sub>/CH<sub>3</sub> spectral windows would scale with chain length (Fig. 2a).  
193 Using pure saturated fatty acid standards of variable chain length, we observed a nearly linear (R<sup>2</sup>  
194 = 0.97) relationship between chain length and the ratio of CH<sub>2</sub>/CH<sub>3</sub> area under the curve (Fig. 2b).  
195 We next tested whether we could use this relationship to estimate chain length production profiles.

196  
197 In *E. coli*, fatty acid biosynthesis is carried out through a multistep, enzymatic Claisen reduction  
198 (41). The enzymatic components of type II fatty acid synthesis in *E. coli* are encoded as separate  
199 proteins, creating a pathway in which two carbons are added to an elongating acyl-ACP chain with  
200 each cycle (Fig. 2c). The number of cycles around this pathway before the elongating acyl chain  
201 is cleaved by an acyl-ACP thioesterase determines the resulting fatty acid chain length. The  
202 primary factor driving chain length is thought to be the enzymatic specificity of the heterologously  
203 expressed thioesterase (11, 42). Researchers have carried out numerous efforts to engineer  
204 specificity of acyl-ACP thioesterases in order to create desired chain length profiles (14, 37, 43–  
205 45). Several thioesterases have been shown previously to produce a range of free fatty acid chain  
206 length profiles. Three examples are *CpFatB1\**, *AbTE\**, and 'TesA. The *CpFatB1\** and *AbTE\**  
207 thioesterases originate from *Cuphea palustris* and *A. baylyi*, respectively, and the “ \* ” denotes

208 mutants that were engineered to increase activity in *E. coli* (37, 46). ‘TesA is *E. coli*’s native  
209 thioesterase, where the “ ‘ ” denotes deletion of the leader sequence (35). Endogenously, TesA  
210 contains a leader sequence that localizes the enzyme to the periplasm; deleting the leader peptide  
211 sequence allows for interaction with cytosolic acyl-ACPs, enabling the production of free fatty  
212 acids (35) (Fig. S4).

213  
214 To test our ability to estimate chain length distributions using imaging, we examined strains  
215 *CpFatB1\**, *AbTE\*-FV50*, and ‘TesA-FV50, which each express a different thioesterase (Table 1,  
216 Table 2). Strains *AbTE\*-FV50* and ‘TesA-FV50 additionally express heterologous *fadR* and  
217 *vhb50*, which have been shown to increase free fatty acid production (12, 47). *FadR* is a  
218 transcription factor that regulates many genes in the fatty acid synthesis pathway for increased free  
219 fatty acid titer when expressed alongside ‘TesA. *Vhb50* is a *Vitreoscilla* hemoglobin that further  
220 increases fatty acid production by increasing oxygen uptake. We conducted an experiment in  
221 which each of the three strains were grown in liquid culture and thioesterase expression was  
222 induced for 24 hours to produce free fatty acids. Samples from each production culture were taken  
223 in parallel for GC-MS quantification and SRS hyperspectral imaging. As expected, GC-MS results  
224 show highly variable chain length distributions depending on the thioesterase expressed (Fig. 2d).  
225 *CpFatB1\** primarily produces octanoic acid (C8:0). *AbTE\*-FV50* produces a mix of medium- and  
226 long-chain saturated fatty acids with myristic acid (C14:0) as the largest component. Lastly,  
227 ‘TesA-FV50 produces long-chain fatty acids with large contributions from both myristic (C14:0)  
228 and palmitic acid (C16:0). Since each production strain has a unique chain length profile, they  
229 serve as an ideal group of strains to test our ability to predict chain length distributions with SRS  
230 imaging.

231  
232 To implement chain length prediction, we first decomposed the spectra at each pixel into protein  
233 and representative fatty acid chemical maps (C10:0, C16:0, C16:1). The protein and unsaturated  
234 fatty acid maps were then subtracted from the raw SRS image to produce a hyperspectral SRS  
235 image of saturated fatty acids (Fig. S5), which can be used to estimate the average chain length at  
236 each pixel. We introduced a concentration weighting factor using the SRS spectral ensemble  
237 intensity at the same pixel. The SRS predicted chain length distributions closely matches the  
238 qualitative features of the GC-MS distributions (Fig. 2e). Importantly, the prediction captures  
239 whether the strain produces primarily medium- or long-chain fatty acids, or a mixture of both. In  
240 the case of ‘TesA-FV50, which produces primarily a mixture of C14 and C16, the SRS prediction  
241 results in either chain length largely dominating. This may stem from the binning needed during  
242 analysis to make a digital, even length prediction. For example, if a mixture of chain lengths is not  
243 spatially separated, a pixel prediction of 14.9 will result in a binary chain length prediction of all  
244 C14 (Methods). However, using several samples can correct for this type of issue, as seen in the  
245 average chain length prediction for ‘TesA-FV50.

246  
247 To gauge unsaturation levels, we utilized the presence of the Raman peak at  $\sim 3000\text{ cm}^{-1}$ , which is  
248 unique to the C=CH<sub>2</sub> bonds in unsaturated fatty acids (Fig. 2f). This peak serves as an identifier of  
249 unsaturation level and components from this fatty acid source can be unmixed with LASSO  
250 regression. To demonstrate our ability to predict unsaturation level from production strains, we  
251 tested the same three strains, which have different ratios of unsaturation to saturation (Fig. S4).  
252 The ratio of unsaturation from GC-MS data scales linearly with predicted unsaturated ratios from  
253 SRS images (Fig. 2g), giving an indication of the ability of this approach to predict the ratio of

254 unsaturation. With the ability to calculate unsaturation level in addition to chain length  
255 distributions from SRS images, we cover many aspects of free fatty acid production that are  
256 important for metabolic engineers, bringing SRS hyperspectral imaging closer to a form of optical  
257 mass spectrometry.

258  
259 We next applied our compositional analysis to *AbTE\**-FV50 seeded and grown on agarose pads  
260 (Fig. 2h). Highly productive strains will secrete end-products, making it difficult to track the source  
261 of produced chemicals back to the cells that generated them. Therefore, sampling from liquid  
262 culture for imaging does not accurately provide production heterogeneity information. To ensure  
263 that free fatty acid production is tracked to the cells responsible for production, we first grew cells  
264 on agarose pads such that production could be localized to the region containing the cells. We  
265 observed a large aggregate of fatty acid outside the cells that is primarily composed of saturated,  
266 long chain fatty acids. This differs from interpretations of GC-MS quantification where it is  
267 assumed that long chain fatty acids remain within the cell (37). Additionally, single-cell chain  
268 length maps display a relatively homogenous makeup of chain lengths between individual cells,  
269 which is consistent with current understanding of the fatty acid synthesis pathway and thioesterase  
270 specificity (15). However, without single-cell resolution it would not be possible to distinguish  
271 between this scenario and one where chain length mixtures produced from bulk culture originate  
272 from distinct subpopulations that produce primarily one chain length each.

### 273 274 **Quantification of heterogeneity in fatty acid production strains**

275 Given our ability to image production at the single-cell level, we asked whether our strains  
276 displayed production heterogeneity in the overall levels of fatty acid produced. Previous studies  
277 have reported sub-populations within production cultures that are less productive and lead to  
278 decreased overall performance of the population in a scaled up bioprocess (23, 48). Single-cell  
279 chemical imaging with SRS is uniquely suited to quantifying this phenomenon. We focused on  
280 strains *AbTE\**-FV50 and ‘*TesA*-FV50 for agarose pad experiments because *CpFatB1\** displayed  
281 poor growth in the agarose pad conditions.

282  
283 We first quantified fatty acid production from *E. coli* microcolonies of the wild type and ‘*TesA*-  
284 FV50 production strain (Fig. 3a). Interestingly, ‘*TesA*-FV50 microcolonies exhibit a high level of  
285 colony-to-colony production variation. This intercolony heterogeneity is visible in the fatty acid  
286 chemical maps, with strains from the same original source exhibiting high and low producing  
287 microcolonies. One possible explanation for these differences in production is variable  
288 transcriptional regulation of key enzymes that are maintained through replication, leading to  
289 metabolic bottlenecks (7, 49). Alternatively, the ability to manage toxicity associated with  
290 production in the time frame following thioesterase induction may lead to divergent production  
291 outcomes (50).

292  
293 We also examined production heterogeneity in the fatty acid production strain, *AbTE\**-FV50.  
294 Strikingly, we observed a very different type of production variation in this strain (Fig. 3b). Unlike  
295 the intercolony heterogeneity in ‘*TesA*-FV50, the *AbTE\**-FV50 strain has high heterogeneity  
296 between cells in a single microcolony. We used the protein channel to segment the image into  
297 single cells for analysis (Fig. S6) and quantified single-cell production (Fig. 3c). Our quantification  
298 indicates that in this strain a small percentage of cells produce the vast majority of fatty acids. This

299 result is consistent across many fields of view within the microscopy images, suggesting that it is  
300 a general feature of this production strain (Fig. S7).

301

### 302 **Longitudinal SRS imaging of fatty acid production during growth of colonies**

303 Understanding the dynamics of chemical production with single-cell resolution can provide key  
304 insights into the emergence of heterogeneity, production bottlenecks, and can guide engineering  
305 strategies to maximize metabolic flux. To that end, we sought to adapt the SRS system for  
306 longitudinal imaging. While SRS imaging of living cells has been reported (26, 51, 52), its  
307 application to chemical production over long periods of growth has not been demonstrated.  
308 Previous work from Wakisaka, *et al.* achieved video rate SRS for short periods of time by reducing  
309 spectral acquisitions to four points in the C-H region (26). For metabolic engineering applications,  
310 however, spectral fidelity and time scales on the order of bioprocesses would provide a more useful  
311 form of longitudinal imaging. Therefore, we sought to develop parameters amenable to  
312 longitudinal imaging without loss of spectral information. We installed an incubator on the  
313 microscope stage and grew live cells on agarose pads for at least 16 hours at 31°C. First, we tested  
314 whether the routine laser powers we used for endpoint SRS imaging were damaging to live cells  
315 (75 mW for 1040 nm Stokes and 15 mW for 800 nm pump at the sample). At the beginning of  
316 longitudinal imaging, we captured a bright field transmission image and measured a hyperspectral  
317 SRS image in one field of view (Fig. S8a-b). After 16 hours of incubation, cells that were  
318 previously exposed to SRS imaging did not duplicate, nor did they produce significant levels of  
319 fatty acids. In contrast, cells in a region in the immediate vicinity that had not been exposed to  
320 imaging grew into a dense microcolony and produced fatty acid droplets (Fig. S8c-d). Although  
321 the laser exposure did not induce visible cell damage, the photodamage altered cell growth,  
322 indicating that these laser powers were too high.

323

324 To optimize the imaging conditions to reduce phototoxicity, we performed the same live-cell  
325 experiment with lower laser powers. We obtained normal cell growth when we reduced the Stokes  
326 power from 75 to 25 mW, while the pump laser at 800 nm was kept as 15 mW (Fig. S9). To  
327 illustrate growth and fatty acid production, we measured transmission and SRS images for the  
328 same field of view after 3 and 5 hours of incubation, seeing clear evidence of replication even after  
329 SRS imaging. We took a final wide-field image at 6 hours, which showed that cells continued to  
330 replicate normally, demonstrating that these laser power parameters permit growth. To further  
331 probe how these imaging conditions impact cells, we utilized a stress-responsive promoter,  $P_{ibpAB}$ ,  
332 to drive expression of mRFP1 (Fig. S10a).  $P_{ibpAB}$  is driven by the heat shock  $\sigma$ -factor ( $\sigma^{32}$ ) and is  
333 upregulated in response to stress (53). We first exposed cells to the 25 mW / 15 mW laser  
334 intensities describe above and compared promoter activity to cells that received no SRS exposure  
335 (Fig. S10b). Although these cells were able to grow, RFP expression indicates that intracellular  
336 stress was significantly upregulated in response to SRS exposure. To lower laser exposure further,  
337 we increased the step size of each laser scan from 150 nm to 230 nm, corresponding to fewer pixels  
338 per image. With the increased step size, RFP expression showed no significant difference relative  
339 to the cells that received no laser exposure (Fig. S10b). Therefore, we concluded that using both  
340 reduced laser powers and increased step size can allow for longitudinal SRS imaging.

341

342 With these optimized imaging conditions, we first tracked fatty acid production within the strain  
343 ‘TesA-FV50. In line with heterogeneity patterns we originally observed in this strain (Fig. 3a), the  
344 production trajectories varied across microcolonies (Fig. 4a-b). In one example, fatty acid signals



345 increased in cells starting ~12 hours after thioesterase induction (Fig. 4a). After the microcolony  
346 reached a high cell density on the agarose pad, we observed significant accumulation of fatty acids.  
347 In contrast, a second microcolony of the same strain produced only low levels of fatty acid (Fig.  
348 4b). For comparison, we also tracked the growth and fatty acid production of wild type cells under  
349 the same conditions, observing only low levels of fatty acid production (Fig. S11). Time-lapse  
350 wide-field transmission images for the wild type strain show that cells under SRS laser exposure  
351 grew well during the entire experiment period and at levels comparable to those regions not  
352 exposed to imaging, reaffirming that these conditions are non-toxic (Movie S1). We quantified  
353 fatty acid and protein levels of each microcolony and the wild type strain. Protein levels in each  
354 strain increased at comparable rates (Fig. 4c). Fatty acid levels in the wild type colony increased  
355 modestly while the high-producing 'TesA-FV50 microcolony fatty acid levels increased  
356 dramatically (Fig. 4d). The low-producing 'TesA-FV50 microcolony produced fatty acids at levels  
357 comparable to wild type.

358  
359 The activity in the high-producing 'TesA-FV50 microcolony is in line with known regulation  
360 patterns in *E. coli* fatty acid synthesis. When high cell density is reached in wild type *E. coli*, the  
361 pathway is inhibited by a buildup of acyl-ACPs. This mechanism is reported to act through direct  
362 inhibitory interactions with key enzymes within the pathway, such as acetyl-CoA carboxylase,  
363 FabH, and FabI (54, 55). Additionally, acyl-ACP or acyl-CoA responsive transcription factors,  
364 FadR and FabR, respectively, act to regulate transcriptional responses that control fatty acid  
365 synthesis (56, 57). In the presence of a cytosolic thioesterase, as in the 'TesA-FV50 strain, this  
366 inhibition is released through the conversion of accumulated acyl-ACPs to free fatty acids.  
367 However, thioesterase expression is induced starting at  $t = 0$  hr, and significant accumulation of  
368 fatty acid does not happen until the microcolony is well established. Even with the 'TesA  
369 thioesterase highly expressed, phospholipid metabolism may dominate metabolic flux through the  
370 fatty acid synthesis pathway until sufficient density is reached to suppress incorporation of acyl-  
371 ACPs into phospholipids. A recent study from Noga *et al.* uncovered a post-translational  
372 mechanism that modulates phospholipid biosynthesis through PlsB acyltransferase and ppGpp,  
373 which may explain the delay in free fatty acid accumulation (58).

374  
375 Additionally, we measured the dynamics of the *AbTE\**-FV50 fatty acid production strain at the  
376 microcolony level, which produces a variety of medium- and long-chain fatty acids (Fig. S4), with  
377 significant heterogeneity in production among cells (Fig. 3b-c). We again observed fatty acid  
378 production over time, with similar delays in fatty acid accumulation despite thioesterase induction  
379 at  $t = 0$  hr (Fig. S12a). In this strain, a few cells within the microcolony produce large amounts of  
380 fatty acid. The production dynamics for these few cells are similar to fatty acid production within  
381 the 'TesA-FV50 strain, but the remainder of cells exhibit at low levels of production for the  
382 duration of imaging.

383  
384 To further understand the dynamics of fatty acid production, we tracked the composition of  
385 individual droplets from the high producing 'TesA-FV50 microcolony and high producing cells  
386 from the *AbTE\**-FV50 microcolony. Both saturated and unsaturated fatty acid levels increase  
387 similarly within the droplets of the 'TesA-FV50 strain (Fig. 4e-f). Interestingly, the high producing  
388 cells from the *AbTE\**-FV50 strain initially produce saturated fatty acids, but saturated fatty acid  
389 levels plateau in a subset of cells as the incubation continues (Fig. S12b). Alternatively,  
390 unsaturated fatty acid production continues to increase for the duration of the experiment (Fig.

391 S12c). Additionally, we analyzed the chain length composition for both strains longitudinally (Fig.  
392 S13a-b). Droplets from ‘TesA-FV50 ranged from C14-C16 in length, which is in line with bulk  
393 culture production. Chain lengths for *AbTE\**-FV50 high producer cells displayed high fluctuations  
394 over time and range from C7-C14, which is shorter than expected in comparison with bulk culture  
395 data. We believe the fluctuations and low chain length predictions stem from a decreased signal-  
396 to-noise ratio using our low power parameters for longitudinal imaging. When the signal-to-noise  
397 ratio is increased for stronger SRS signals, such as for the large extracellular droplet within the  
398 *AbTE\**-FV50 microcolony, the chain length prediction increases to a range between C12-C14,  
399 which more closely matches bulk culture data (Fig. S12a, Fig. S13b).

400

### 401 **Single cell growth-production relationship**

402 Next, we asked whether cell-to-cell differences in fatty acid production correlate with differences  
403 in growth rates between cells. Production of a heterologous product is often associated with  
404 changes in cell physiology due to the consumption of resources and intermediate or end-product  
405 associated toxicities (59–61). Consequently, we asked whether growth rate is inversely correlated  
406 with fatty acid production. For this analysis, we focused on the *AbTE\**-FV50 strain because it  
407 exhibits significant intracolony heterogeneity. At the bulk culture level, we do not observe a  
408 decrease in growth when production is induced through *AbTE\** expression (Fig. S14a-b).  
409 However, bulk culture measurements do not rule out slow growth of a high-producing  
410 subpopulation. To understand whether there exists a growth tradeoff in the high producer  
411 subpopulation, we measured growth at the single-cell level. Although we can resolve single cells  
412 using the longitudinal SRS conditions, the lowered resolution needed to avoid phototoxicity  
413 hinders single-cell segmentation to quantitatively probe growth at many time points. To avoid  
414 these limitations, we used a combination of time-lapse, phase contrast microscopy followed by  
415 endpoint SRS imaging (Fig. 5a). Using the high-resolution phase contrast images, we then  
416 segmented and quantified single-cell growth rates using an automated segmentation pipeline for  
417 microcolonies (62). Pairing growth quantification with endpoint SRS, we tracked the growth  
418 trajectories and lineages of single cells within the microcolony to their fatty acid production.  
419 Spectral decomposition of the endpoint SRS image allows the high fatty acid cells to be identified,  
420 along with other chemical composition information (Fig. 5b). Growth of the high producer cells  
421 in the microcolony, measured as cell length over time, did not correlate with lower growth rates  
422 (Fig. 5c, Fig. S15, Movies S2-4). We binned cells into two groups, low and high fatty acid  
423 producers, where we defined high producers as those with production in the top 15% of single  
424 cells in the distribution (Fig. S16). Examining the growth rates of each cell near the endpoint (16  
425 hr) and earlier in the time course (8 hr) shows that growth rate is not significantly different between  
426 the high and low producers.

427

428 Given our ability to decompose the fatty acid signal into unsaturated and chain length components,  
429 we also analyzed the top 10 producer cells’ composition to gain further insight into the high fatty  
430 acid phenotype in this strain. In contrast with GC-MS measurements sampled from bulk culture,  
431 each cell is enriched with lauric acid (C12:0) relative to other saturated fatty acid chain lengths  
432 (Fig. 5e). Additionally, the unsaturation ratio of the top producers is significantly increased in high  
433 producer cells relative to bulk culture sampling (Fig. 5f, Fig. 2g). The decreased levels of myristic  
434 acid (C14:0) and palmitic acid (C16:0) present in the high fatty acid cells relative to bulk culture  
435 may be related to unsaturated fatty acid biosynthesis. In *E. coli* fatty acid synthesis, double bonds  
436 in the carbon tail of elongating fatty acids are formed specifically when the carbon chain has

437 reached decanoyl-ACP (C10), followed by further elongation to C12:1, C14:1, or C16:1 (63). It is  
438 possible that chain lengths that would have otherwise reached C14:0 and C16:0 are instead  
439 unsaturated.

440  
441

## 442 **Discussion**

443 Chemical imaging can play a key role in the strain engineering process. Current quantification  
444 techniques rely either on methods like GC-MS, which are chemically-specific but where  
445 information about individual cells and their dynamics are lost, or on fluorescent reporters or dyes,  
446 which are indirect readouts and can be difficult to engineer or limited in their specificity. SRS  
447 imaging has the potential to dramatically improve this process by providing key insights into  
448 chemical production at the single-cell level. Thus, methods that were previously only accessible  
449 with single-cell readouts, such as directed evolution or cell-sorting approaches are in principle  
450 possible with SRS imaging. Further, the ability to track production changes over time can provide  
451 insight into the emergence of production heterogeneity and, ultimately, guide strategies to avoid  
452 low producers in the population. The landscape for strain engineering is expanding rapidly, with  
453 systems biology approaches to enzyme engineering and novel technologies for quantifying  
454 production offering great promise for improving designs. In this study we focus on fatty acid  
455 synthesis, which is an important pathway that can be engineered to produce a diversity of valuable  
456 chemicals. Development of this pathway towards near theoretical yields will be important to  
457 replace many industrial chemicals with sustainable bio-based alternatives (5).

458  
459 Here, we examined free fatty acid production strains of *E. coli* using SRS and demonstrated that  
460 hyperspectral imaging allows for image decomposition into major chemical components, with the  
461 ability to distinguish cells from their chemical product. By incorporating additional analysis, we  
462 also introduce an approach that can estimate chain length distribution and unsaturation degree,  
463 increasing the amount of information that can be extracted from SRS hyperspectral images. These  
464 advances can enable a metabolic engineer to examine fatty acid production strains using SRS  
465 imaging while maintaining important chemical specificity data. The ability to gauge enzyme  
466 specificity through imaging opens the possibility of screening mutant enzyme libraries in a high  
467 throughput fashion to select for optimal free fatty acid profiles.

468  
469 Visualizing chemical production at the single-cell level reveals important information that would  
470 otherwise be obscured by bulk culture quantification methods. We demonstrate this by examining  
471 production heterogeneity among different engineered strains, observing both intra- and inter-  
472 colony differences in production within microcolonies. These results provoke fundamental  
473 questions about the mechanisms leading to cellular heterogeneity, and also suggest that  
474 engineering strategies that eliminate low-producers could improve yields. For example, it may be  
475 possible to gradually enhance the overall production levels of a strain of engineered *E. coli* through  
476 multiple cycles of growth and dilution, with a step that removes low-producers at the end of each  
477 cycle.

478  
479 Furthermore, we established parameters that allow us to extend SRS imaging for longitudinal  
480 studies in live cells. Unlike previous phototoxicity studies focusing on acute responses like  
481 membrane blebbing (64, 65), we directly observe long-term cell functions including cell  
482 replication, free fatty acid synthesis, and the absence of induction of stress response. SRS imaging

483 has been used to probe metabolic heterogeneity in live cells previously in an elegant study by  
484 Wakisaka *et al.* (26), and we extend these results in several critical ways. In our experiments we  
485 track the same cells over multiple hours, rather than sampling new cells from liquid culture at each  
486 timepoint. In addition, we use *E. coli* for our study while Wakisaka *et al.* use the alga *Euglena*  
487 *gracilis*. *E. coli* are highly amenable to metabolic engineering, but their small size makes both  
488 imaging and analysis more challenging (*E. coli* are 1-2  $\mu\text{m}$  in length while *E. gracilis* are 35-50  
489  $\mu\text{m}$  (66)). Thus, our results significantly extend prior findings, offering longitudinal imaging of a  
490 highly relevant engineered species. We envision production tracking at the single-cell level will  
491 be valuable for metabolic engineering studies by establishing how and when heterogeneity  
492 emerges. To quantify single-cell properties such as growth rate, however, higher resolution  
493 longitudinal imaging is needed to achieve time lapse data that can be processed with segmentation  
494 algorithms. Further development focused on mitigating phototoxicity without decreasing  
495 resolution may be able to overcome this challenge in the future.

496  
497 As we demonstrate, a hybrid approach using phase contrast imaging and endpoint SRS microscopy  
498 allows for fundamental questions to be examined, such as the growth-production tradeoff.  
499 Interestingly, in the *AbTE*\*-FV50 strain that we studied using this hybrid approach, we observed  
500 no tradeoff between growth and production. This information, along with insights into the  
501 composition of the high fatty acid cells, can lead to novel hypotheses of the underlying cause of  
502 intracolony heterogeneity in this strain. These results underpin the utility of examining single-cell  
503 characteristics to increase performance of a given strain. For example, recent approaches to  
504 increase bioproduction involving dynamic regulation, either through transcriptional feedback  
505 circuits or optogenetic regulation, show promise to increase strain efficiency (67, 68). Imaging  
506 single-cell production dynamics in these strains could increase our understanding of how feedback  
507 systems can be used in the context of metabolic engineering. Together with synthetic biology  
508 methods, our system has the potential to answer fundamental questions relating to the production  
509 of biosynthetic targets at the single-cell level. Further, because SRS imaging does not require  
510 engineered biosensors, it has the potential to serve as a widely useful platform to boost the pace of  
511 strain engineering for a broad range of metabolites.

512  
513 Moving forward, it will be important to understanding the connection between production at the  
514 single-cell level and bulk culture output. Imaging fields of view sampled from bulk culture can  
515 potentially lead to biased overall titer prediction, especially if the product is not soluble in water.  
516 Alternatively, studying microcolonies grown on agarose pads is ideal for imaging but not  
517 necessarily predictive of bulk culture behaviors. For example, nutrient mixing, population  
518 selection, and secretion may differ between the two-dimensional growth conditions and a well-  
519 stirred liquid culture. Additionally, SRS has sensitivity limits significantly higher than mass  
520 spectrometry (69) and thus requires a product to be produced at sufficient quantities before SRS  
521 can be used to guide further engineering. Given these limitations, we envision that SRS studies  
522 will be most useful for strain optimization rather than enzyme or pathway discovery.

523  
524 SRS imaging in different spectral regions, such as the fingerprint region (400-1800  $\text{cm}^{-1}$ ), can be  
525 adapted to study strains producing non-fatty acid derived chemicals of interest, such as terpenes,  
526 to expand the scope of SRS imaging in metabolic engineering (29). In addition, because the  
527 approach is label-free it does not require biosensors with fluorescent reporter readouts, making it  
528 amenable to quantification of production in organisms that are recalcitrant to genetic modification.

529 Moreover, instrumentation advancements can enable SRS guided single-cell screening, such as  
530 SRS-based cell sorting, which has been demonstrated recently for cell phenotyping (70). The  
531 throughput we achieve in this study is limited by spectral tuning of the motorized delay stage and  
532 time spent manually focusing on samples. In future work, applying the ultrafast spectral tuning  
533 SRS system from Lin *et al.* (29), along with integrated autofocusing could drastically increase  
534 throughput. Much like the utility of fluorescence activated cell sorting in synthetic biology  
535 applications, we envision that SRS-based cell sorting could increase the throughput of strain  
536 screening and enable directed evolution based on chemical production. This work acts as a jumping  
537 off point for SRS imaging in metabolic engineering to aid in the development of more efficient  
538 strains for renewable chemical production.

539  
540  
541  
542

## 543 **Methods**

544

### 545 **Bacterial strains and plasmids**

546 Plasmid and strain information are listed in Tables 1 and 2. The pBbA5c-*tesA*-vhb50-8fadR  
547 plasmid was a gift from Dr. Fuzhong Zhang. The BW25113  $\Delta$ *fadE* strain is from the Keio  
548 collection (71), and we used the FLP recombination protocol from Datsenko and Wanner to cure  
549 the *kan<sup>R</sup>* cassette from the genome (72). We used golden gate cloning (73) to create the pBbA5c-  
550 vhb50-8fadR plasmid by deleting the coding sequence of *tesA* from pBbA5c-*tesA*-vhb50-8fadR.  
551 The pBbA5c-CpFatB1.2-M4-287 plasmid was also constructed using golden gate cloning, with  
552 the pBbA5c backbone amplified from the BglBrick plasmid library (74) and the coding sequence  
553 of CpFatB1.2-M4-287 derived from Hernández Lozada *et al.* (46) and synthesized by Twist  
554 Biosciences (South San Francisco, CA). pSS200 was a gift from Dr. Pamela Peralta-Yahya. pBbE-  
555 *ibpAB*-mRFP1 was constructed using the pBbE5k BglBrick backbone (74) with the promoter  
556 region of the genomic *ibpAB* operon as in Ceroni *et al.* (53). We constructed pBbA5c-*tesA*-sfGFP-  
557 vhb50-8fadR and pSS200-sfGFP using golden gate cloning with pBbA5c-*tesA*-vhb50-8fadR and  
558 pSS200 as backbones, respectively, along with an sfGFP coding sequence containing a flexible  
559 GS linker to insert in frame with each thioesterase.

560

### 561 **Growth and induction of fatty acid production strains**

562 For fatty acid production experiments, pre-cultures were grown overnight in LB media and used  
563 to inoculate 3 mL M9 minimal media (M9 salts, 2mM MgSO<sub>4</sub>, 100  $\mu$ M CaCl<sub>2</sub>) with 2% glucose  
564 and grown at 37°C with 200 rpm shaking. Antibiotics were added to the media where necessary  
565 for plasmid maintenance according to resistances in Table 1 (100  $\mu$ g/ml for carbenicillin and 25  
566  $\mu$ g/ml for chloramphenicol). The cultures were allowed to grow until approximately OD<sub>600</sub> = 0.6  
567 before thioesterase expression was induced with IPTG. Induction levels were 500  $\mu$ M for *TesA*-  
568 FV50 and 50  $\mu$ M for *AbTE\**, *AbTE\**-FV50, and *CpFatB1\**. For imaging from liquid cultures, cells  
569 were grown for 24 hours after IPTG induction and then 3  $\mu$ L of sample was taken for imaging.  
570 Samples from liquid culture were placed on 3% agarose pads (Promega) containing M9 minimal  
571 media and sandwiched between glass coverslips to immobilize the cells for imaging. Samples from  
572 liquid culture were allowed to dry on the agarose pads for ~15 minutes prior to imaging. For  
573 longitudinal imaging, production heterogeneity experiments, and phase contrast imaging, once  
574 cells reached OD<sub>600</sub> = 0.6 in liquid culture, the sample was placed on a 3% low melting point

575 agarose pad containing M9 minimal media with 2% glucose, IPTG as specified above, and  
576 appropriate antibiotics for plasmid maintenance, as detailed in Table 1. Microcolonies were  
577 imaged after 18 hours of growth on the agarose pads at 31°C.

578  
579 For the chain length distribution prediction, cultures were induced with IPTG in liquid cultures for  
580 24 hours. At the 24 hour timepoint, we took 3  $\mu$ L of sample for imaging and another sample of the  
581 culture was taken for GC-MS analysis to allow direct comparison of the same culture. Five fields  
582 of view were imaged for each culture.

583  
584 **Fatty acid derivatization and quantification with GC-MS**  
585 Samples for GC-MS quantification were taken at 24 hours post IPTG induction. 400  $\mu$ L of  
586 vortexed culture was taken for fatty acid extraction and derivatization into fatty acid methyl esters  
587 as described by Sarria *et al.* (37) with the following minor modifications: Internal standards of  
588 nonanoic acid (C9) and pentadecanoic acid (C15) were added to the 400  $\mu$ L sample at final  
589 concentrations of 88.8 mg/L each and vortexed for 5 sec. The following was then added to the  
590 sample for fatty acid extraction and vortexed for 30 sec: 50  $\mu$ L 10% NaCl, 50  $\mu$ L glacial acetic  
591 acid, and 200  $\mu$ L ethyl acetate. The sample was then centrifuged at 12,000 g for 10 mins. After  
592 centrifugation, 100  $\mu$ L of the ethyl acetate layer was mixed with 900  $\mu$ L of a 30:1 mixture of  
593 methanol:HCl (12N) in a 2 mL microcentrifuge tube. The solution was vortexed for 30 sec  
594 followed by an incubation at 50°C for 60 mins for methyl ester derivatization. Once cooled to  
595 room temperature, 500  $\mu$ L hexanes and 500  $\mu$ L water were added to the 2 mL microcentrifuge  
596 tube, vortexed for 10 sec, and allowed to settle. 250  $\mu$ L of the hexane layer was mixed with 250  
597  $\mu$ L ethyl acetate in a GC-MS vial for quantification.

598  
599 The samples were analyzed with an Agilent 6890N/Agilent 5973 MS detector using a DB-5MS  
600 column. The inlet temperature was set to 300°C with flow at 4 mL/min. The oven heating program  
601 was initially set to 70°C for 1 min, followed by a ramp to 290°C at 30°C/min, and a final hold at  
602 290°C for 1 min. GLC-20 and GLC-30 FAME standard mixes (Sigma) were tested using this  
603 protocol to ensure proper capture of all chain lengths and to gauge retention times. Internal  
604 standards were used for quantification, with chain lengths C8-C12 quantified with the nonanoic  
605 acid internal standard and C14-C18 quantified with the pentadecanoic internal standard.

606  
607 **Optical setup**  
608 The SRS setup was driven by an 80 MHz femtosecond laser (Insight Deepsee+, Spectra Physics,  
609 USA) with two synchronized outputs. One output was fixed at 1040 nm with a pulse duration of  
610  $\sim$ 150 fs, while the other was tunable from 680 - 1300 nm with  $\sim$ 120 fs pulse width. We used the  
611 1040 nm beam as the Stokes and was modulated by an acousto-optical modulator (522c, Isomet,  
612 USA) at 2.5 MHz. We set the tunable output to 798 nm to excite the C-H region and spatially  
613 combined it with the Stokes by a dichroic mirror. Six 15 cm SF-57 glass rods were used to linearly  
614 chirp the femtosecond pulses to  $\sim$  2 ps. Five of the rods were placed on the common path while  
615 one was placed on the Stokes path to parallelize the degree of chirping considering its longer  
616 wavelength. A motorized delay stage was used to scan the temporal delay between two pulses to  
617 tune the excitation frequency. The combined beams were sent to a pair of two-dimensional galvo  
618 scanners (GVSM002, Thorlabs, USA) to perform laser scanning imaging. We used a 40X oil-  
619 immersion objective (RMS40X-PFO, Olympus, Japan) to focus the laser onto the sample. Powers  
620 on the sample were 15 mW for pump and 75 mW (or 25 mW for longitudinal imaging) for Stokes.

621 A home-built resonant amplifier photodiode collects and amplifies the stimulated Raman loss  
622 signal at the modulation frequency. We used a lock-in amplifier (UHFLI, Zurich Instruments,  
623 Switzerland) to extract the signal and send it to a data collection card (PCIe-6363, National  
624 Instruments, USA). We note that all elements described here are commercially available with the  
625 exception of the photodiode, which has been previously reported (75). Custom LabView (National  
626 Instruments, USA) software was used to synchronize the galvo scan with the delay line scan to  
627 obtain a hyperspectral SRS image stack in a frame-by-frame manner.

628

### 629 **Chemical map processing with LASSO**

630 To obtain concentration maps for chemicals, we perform linear unmixing on the raw hyperspectral  
631 image stack. Assuming the number of pure components as  $K$  and the dimensions of a hyperspectral  
632 image as  $N_x, N_y, N_\lambda$ , the unmixing model can be written as:

$$D = CS + E, \quad (1)$$

633 where  $D \in \mathbb{R}^{N_x N_y \times N_\lambda}$  is the raw data reshaped as a two dimensional matrix in raster order,  $C \in$   
634  $\mathbb{R}^{N_x N_y \times K}$  is the collection of concentration maps,  $S \in \mathbb{R}^{K \times N_\lambda}$  contains SRS spectra of all the  
635 components, while  $E$  is the residual term with error and noise. Given the prior knowledge of  
636 spectra for all the pure components, the task is reduced to generating chemical maps  $C$  via least  
637 square fitting. To avoid crosstalk between spectrally overlapped components, we add a  $L1$  norm  
638 sparsity constraint by observing that at each spatial position, a few components dominate the  
639 contribution. The solution for  $C$  is found in a pixel-by-pixel manner by solving for the following  
640 optimization problem known as the least absolute shrinkage and selection operator (LASSO):

$$\hat{C}_i = \arg \min_{C_i} \left\{ \frac{1}{2} \|D(i, :) - C_i S\|^2 + \beta \|C_i\|_1 \right\}, \quad (2)$$

641 where  $i$  represents a specific pixel in the hyperspectral image,  $\hat{C}_i$  stands for the estimated  
642 concentrations for all components at pixel  $i$ , and  $\beta$  is a hyperparameter controlling the level of  $L1$   
643 norm regularization at each pixel.

644

645 For each imaging experiment, we measured spectra of pure chemical standards for analysis.  
646 Specifically, we input the spectra from the following pure components to perform linear unmixing:  
647 We use BSA as the protein standard, palmitic acid (C16:0) and capric acid (C10:0) as  
648 representative saturated fatty acids, and palmitoleic acid (C16:1) as an unsaturated fatty acid  
649 standard. All standards were sourced from Sigma Aldrich, USA.

650

### 651 **Chain length and unsaturation prediction**

652 To predict chain length distribution, we first processed images with linear unmixing as described  
653 above. However, this analysis outputs two-dimensional chemical maps whereas a three-  
654 dimensional hyperspectral image is needed for chain length prediction. We created a hyperspectral,  
655 saturated fatty acid map by subtracting the protein and unsaturated fatty acid components from the  
656 original background-subtracted hyperspectral image (Fig. S5). We then calculated the area under  
657 the curve ratio of  $\text{CH}_2$  to  $\text{CH}_3$  for each pixel, using 2832 to 2888 nm for  $\text{CH}_2$  and 2909 to 2967 nm  
658 for  $\text{CH}_3$ .

659

660 We used the linear relationship of ratio to chain length produced from standards (C6-C20, Sigma  
661 Aldrich, USA) to calculate a predicted chain length for each pixel. This prediction was then  
662 multiplied by a concentration weighting factor that corresponds to the SRS spectral summation at  
663 the same pixel. Thus, if the raw SRS signal from a region is low then its weight in the overall

664 prediction is also low relative to pixels with strong SRS signal. All pixels' in a field of view  
665 concentration-weighted chain lengths were compiled to create the fatty acid chain length  
666 distribution. To calculate the unsaturation ratio, the sum of the C16:1 chemical map generated  
667 through linear unmixing was divided by the sum of the hyperspectral saturated chemical map. For  
668 the tracking of fatty acids production and composition dynamics (Fig. 4e-f, Fig. S12, Fig. S13),  
669 we manually segmented significant fatty acid droplets using the fatty acid concentration map in  
670 the last time stamp. Each droplet was manually traced and segmented frame-by-frame in all earlier  
671 time stamps until no fatty acid was found (Movies S5-6).

672

### 673 **Single cell segmentation**

674 Segmentation of single cells within SRS images was implemented in two steps. The protein  
675 segmentation map was first sent to CellProfiler to generate an initial segmentation (76). A  
676 customized pipeline was used for the analysis, including illumination correction, background  
677 subtraction, and edge enhancements based on the Laplacian of the Gaussian. Then a custom Matlab  
678 program was used to manually correct errors in the automated segmentation analysis using the raw  
679 SRS and protein chemical maps as a guide. When SRS images are segmented, we normalize the  
680 fatty acid channel by cell area instead of the protein channel. This normalization more accurately  
681 represents the single cell production, whereas the protein channel normalization at the microcolony  
682 level accounts for cells growing on top of each other. Since the primary source of heterogeneity in  
683 the *AbTE\*-FV50* is at the single-cell level, we utilize the fatty acid intensity normalized to cell  
684 area metric. Alternatively, heterogeneity seen in the 'TesA-FV50 strain is at the microcolony level  
685 and we use the fatty acid intensity normalized to protein intensity to represent microcolony level  
686 production.

687

688 Segmentation and tracking of phase contrast images was performed using the DeLTA 2.0 pipeline  
689 (62). Segmentation errors were corrected manually prior to downstream analysis. We calculated  
690 growth rate of single cells using the logarithmic derivative of cell length with the following  
691 formula:

692

$$\mu_k = \frac{1}{2\Delta t} \ln \frac{L_{k+1}}{L_{k-1}}$$

693 Where  $\mu$  is growth rate,  $k$  is the current frame,  $\Delta t$  is the time between frames, and  $L$  is cell length.

694

### 695 **Phase contrast imaging**

696 Cells were imaged with a Nikon Ti-E microscope using a 100x objective with phase contrast  
697 imaging. Images were collected every 20 minutes with the microscopy chamber held at 31°C.  
698 Production strains were grown on agarose pads containing M9 minimal media as described above  
699 for SRS imaging. After 18 hours of growth, the position of the tracked microcolony was recorded  
700 and the slide was moved to the SRS microscope for endpoint hyperspectral imaging.

701

### 702 **Stress responsive reporter strain**

703 Cells containing the stress reporter plasmid pBbE-ibpAB-mRFP1 were grown on agarose pads.  
704 The cells were allowed to recover on the agarose pads for 3 hours at 31°C prior to SRS exposure.  
705 After recovery, a field of view on the pad containing several microcolonies was subject to SRS  
706 scanning at various step sizes (150 nm or 230 nm) with power held at 25mW for the Stokes laser  
707 and 15mW for the pump laser. Red fluorescent protein (RFP) images were taken of the scanned  
708 field of view and a nearby, un-scanned field of view every 30 minutes. Since the RFP is



709 photobleached from the SRS scan, the change in RFP of each microcolony was calculated for each  
710 condition. To account for focus differences between fluorescent images at different time points,  
711 the scanned field of view was normalized to the RFP of the nearby, un-scanned microcolonies.

712

713

#### 714 **Acknowledgements**

715 This work was supported by the Office of Science (BER) at the U.S. Department of Energy (DE-  
716 SC0019387 to MJD, JXC, WWW), the National Science Foundation (1804096 to MJD), and NIH  
717 R35 GM136223 to JXC. We thank Dr. Normal Lee and the Chemical Instrumentation Center for  
718 assistance with GC-MS experiments. Dr. Joshua Finkelstein provided valuable input on the  
719 manuscript.

720

721

#### 722 **Author Contributions**

723 N.T. and H.L. performed experiments and conducted data analysis. M.J.D., J.X.C., and W.W.W.  
724 provided overall guidance on the project. N.T. was responsible for strain construction, production  
725 quantification, and sample preparation. H.L. performed SRS imaging. J.B.L. performed pilot  
726 experiments with a production strain. O.M.O. helped with single-cell segmentation and tracking  
727 of phase contrast imaging experiments. D.B. helped to develop the GC-MS protocol and quantified  
728 strain production. N.T., H.L., and M.J.D. wrote the manuscript with input from J.B.L., W.W.W.,  
729 and J.X.C.

730

#### 731 **Competing Interests**

732 The authors declare no competing interests.

733

#### 734 **Data Availability**

735 The datasets generated during and/or analyzed during the current study are available from the  
736 corresponding author on reasonable request.

737

#### 738 **Code Availability**

739 The code for spectral analyses used in this study is available from the corresponding author on  
740 reasonable request.

741

742

743

744 **Figures**  
745

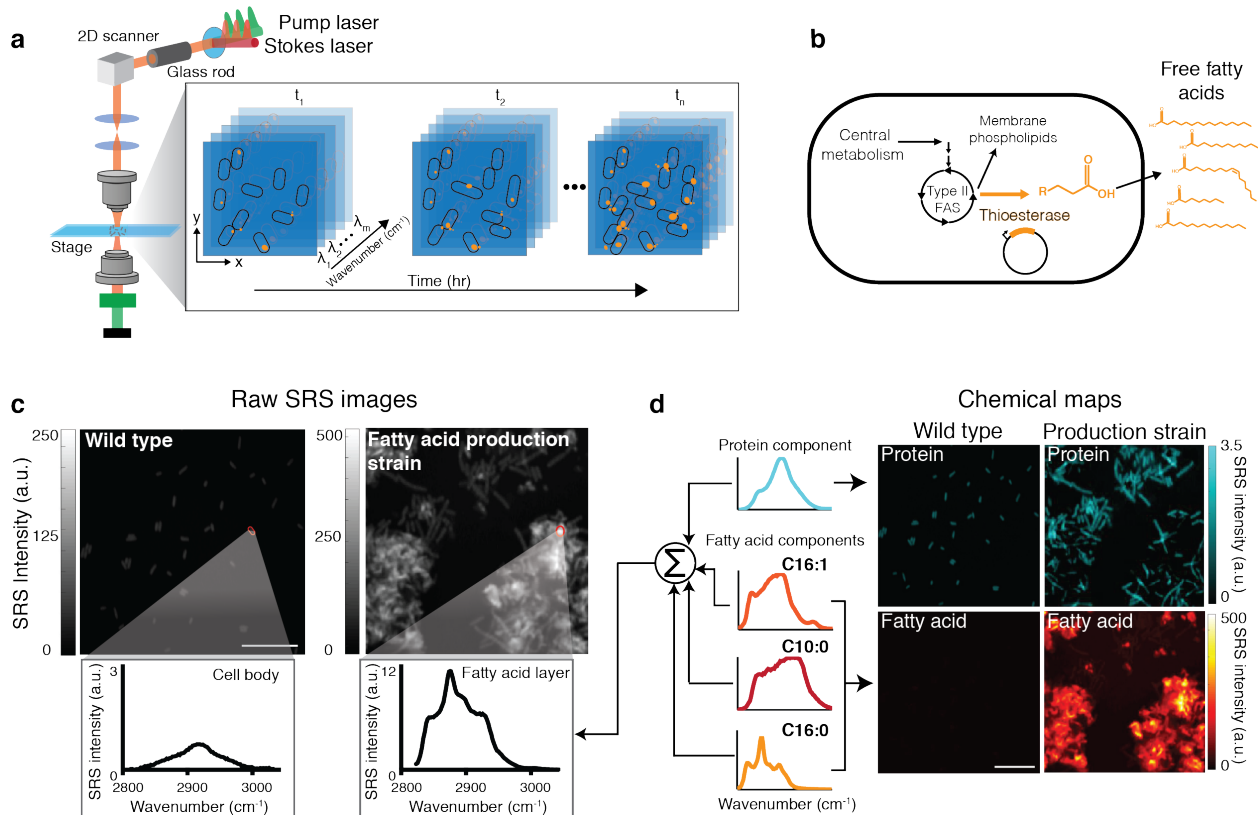

746 **Figure 1. SRS imaging of *E. coli* production strains shows single-cell free fatty acid levels.** (a)  
747 Schematic of the optical setup for SRS imaging to produce hyperspectral images using a Stokes  
748 and pump laser focused on a live sample. Hyperspectral SRS images contain three-dimensional  
749 data: x and y coordinates and wavenumber, which provides spectral information. Longitudinal  
750 SRS imaging adds a fourth dimension, time. (b) Schematic of free fatty acid production in *E. coli*.  
751 Expression of a cytosolic thioesterase results in free fatty acid accumulation through the type II  
752 fatty acid synthesis (FAS) pathway. Free fatty acids can vary in chain length and unsaturation,  
753 largely dictated by thioesterase specificity. (c) Representative raw SRS data from wild type *E. coli*  
754 and a strain overexpressing a cytosolic thioesterase (*AbTE\**). The summation of Raman spectra at  
755 each pixel is shown. Representative regions are outlined in red with the corresponding Raman  
756 spectra shown below the image. Fatty acids and proteins emit strong Raman signals in the C–H  
757 region ( $\sim 2900\text{ cm}^{-1}$ ). Note that the y-axis scales are different; Fig. S3 shows them on the same  
758 scale. Scale bar, 10  $\mu\text{m}$ . (d) Spectra at each pixel of the SRS image can be decomposed to generate  
759 chemical maps. Protein and fatty acid components are decomposed using spectral standards to  
760 produce chemical maps. Spectral standards shown in schematic are Bovine serum albumin (cyan),  
761 palmitoleic acid (C16:1, orange), capric acid (C10:0, red), and palmitic acid (C16:0, yellow).  
762 Protein and fatty acid chemical maps for both strains are shown. Scale bar, 10  $\mu\text{m}$ .  
763  
764  
765

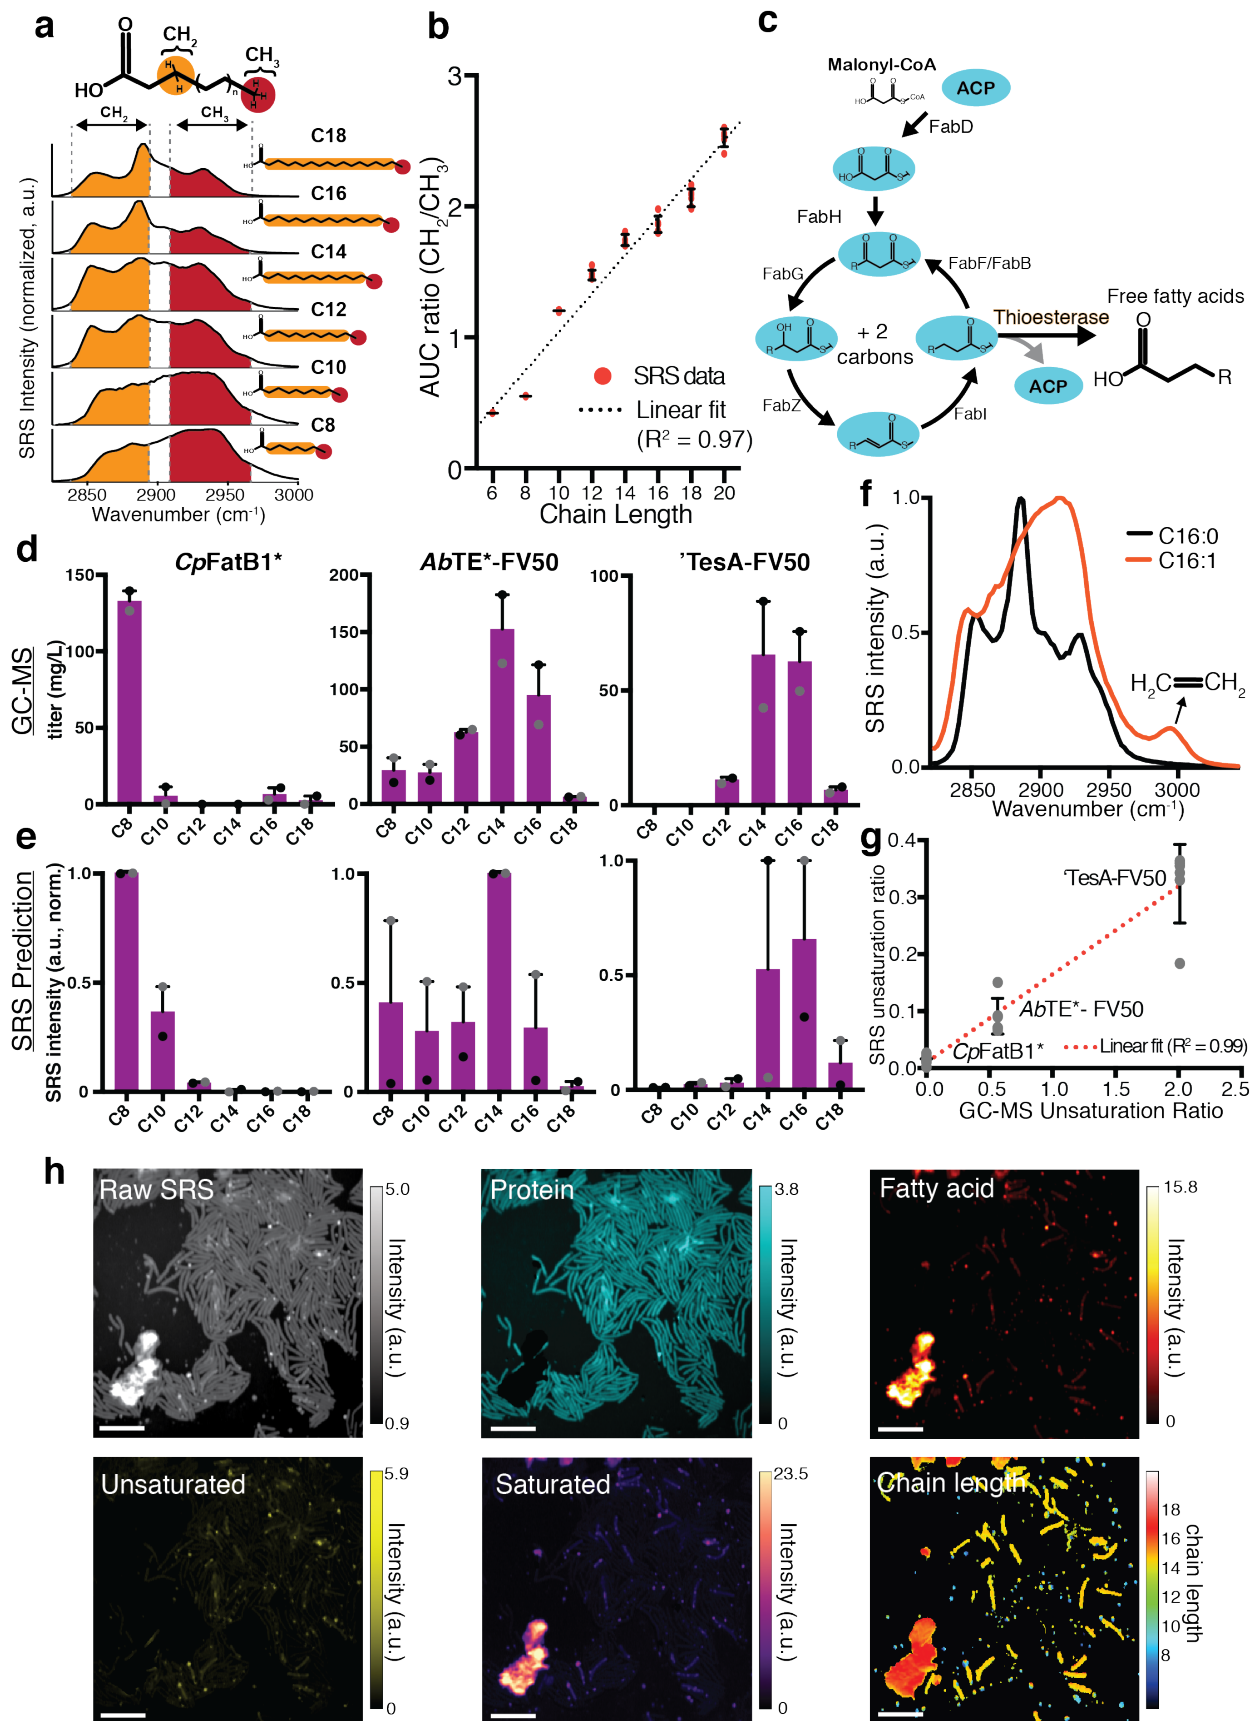

767 **Figure 2. Chain length distribution prediction from different thioesterase enzymes. (a)** The  
768 ratio of internal CH<sub>2</sub> and terminal CH<sub>3</sub> bonds within a fatty acid is a function of chain length.  
769 Raman spectra of pure fatty acid standards are shown for different chain lengths. Specific spectral  
770 windows correspond to each bond. **(b)** The ratio of area under the curve (AUC) of CH<sub>2</sub>/CH<sub>3</sub> bonds  
771 scales approximately linearly with chain length. Error bars show standard deviation of n = 6  
772 replicates. **(c)** Schematic of the type II fatty acid synthesis pathway in *E. coli*. Introduction of an  
773 acyl-ACP thioesterase pulls out elongating acyl-ACPs to form free fatty acids. Enzymatic  
774 specificity of the thioesterase largely determines the distribution of the fatty acid chain length  
775 profile. **(d)** Chain length distribution prediction with GC-MS compared to **(e)** SRS using CH<sub>2</sub>/CH<sub>3</sub>  
776 ratio analysis (n = 2 biological replicates using 5 fields of view for each replicate, errors bars show  
777 standard error). Strains shown are: *CpFatB1\**, *AbTE\*-FV50*, and *TesA-FV50* (Table 2). **(f)** SRS  
778 spectra of saturated and unsaturated fatty acid standards (C16:0, C16:1). The unique peak at ~3000  
779 cm<sup>-1</sup> allows for spectral decomposition of unsaturation content. **(g)** Comparing GC-MS  
780 unsaturation ratio of produced free fatty acids to SRS production based on spectral analysis. Error  
781 bars show standard deviation from n = 5 fields of view for each strain. **(h)** Spectral decomposition  
782 and chain length prediction of *AbTE\*-FV50* grown on an agarose pad. Scale bars, 10 μm.  
783

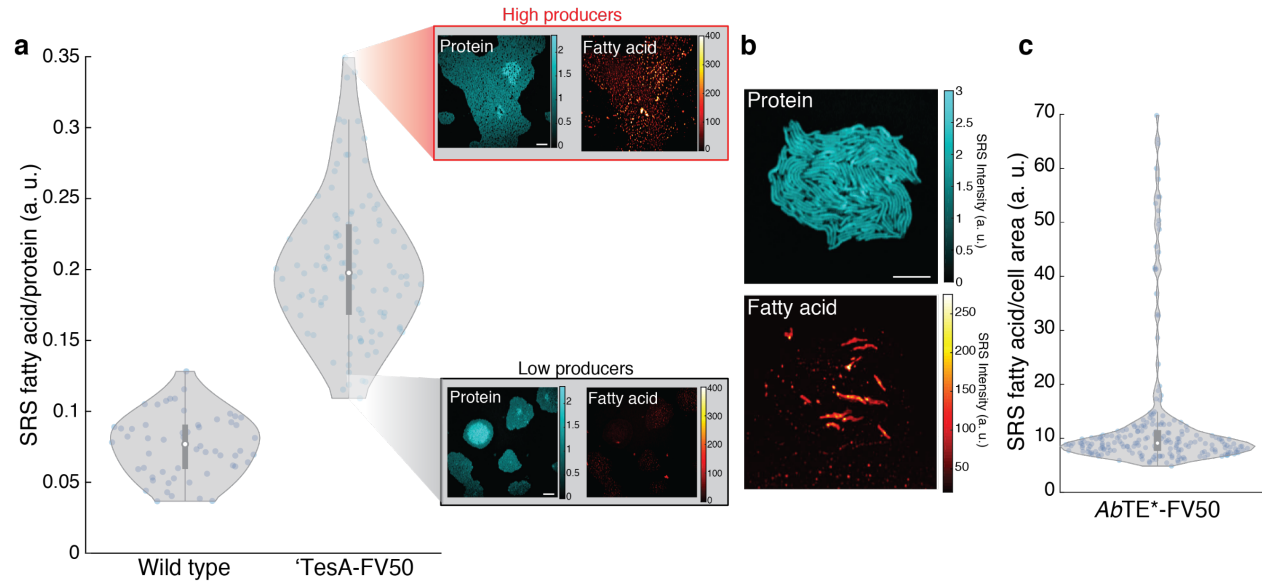

784  
785

786 **Figure 3. Inter- and intra-colony heterogeneity profiles of production strains.** (a) Production  
787 from replicate 'TesA-FV50 microcolonies (n = 105) are compared to wild type microcolonies (n  
788 = 56), revealing inter-colony production heterogeneity. Each data point represents fatty acid  
789 production from a single microcolony. Protein and fatty acid chemical maps are shown for  
790 representative high and low producing microcolonies. Scale bar, 10  $\mu$ m. (b) Representative protein  
791 and fatty acid chemical maps are shown for a microcolony of the production strain *AbTE\*-FV50*.  
792 (c) Intra-colony production is quantified for single cells within the microcolony (n = 213) (Fig.  
793 S6). Each data point represents a single cells' production. Scale bar, 10  $\mu$ m. Box plot overlays  
794 contain median (white circle), first and third quartiles (gray box) and 1.5x interquartile range (thin  
795 gray line) for each distribution.

796  
797

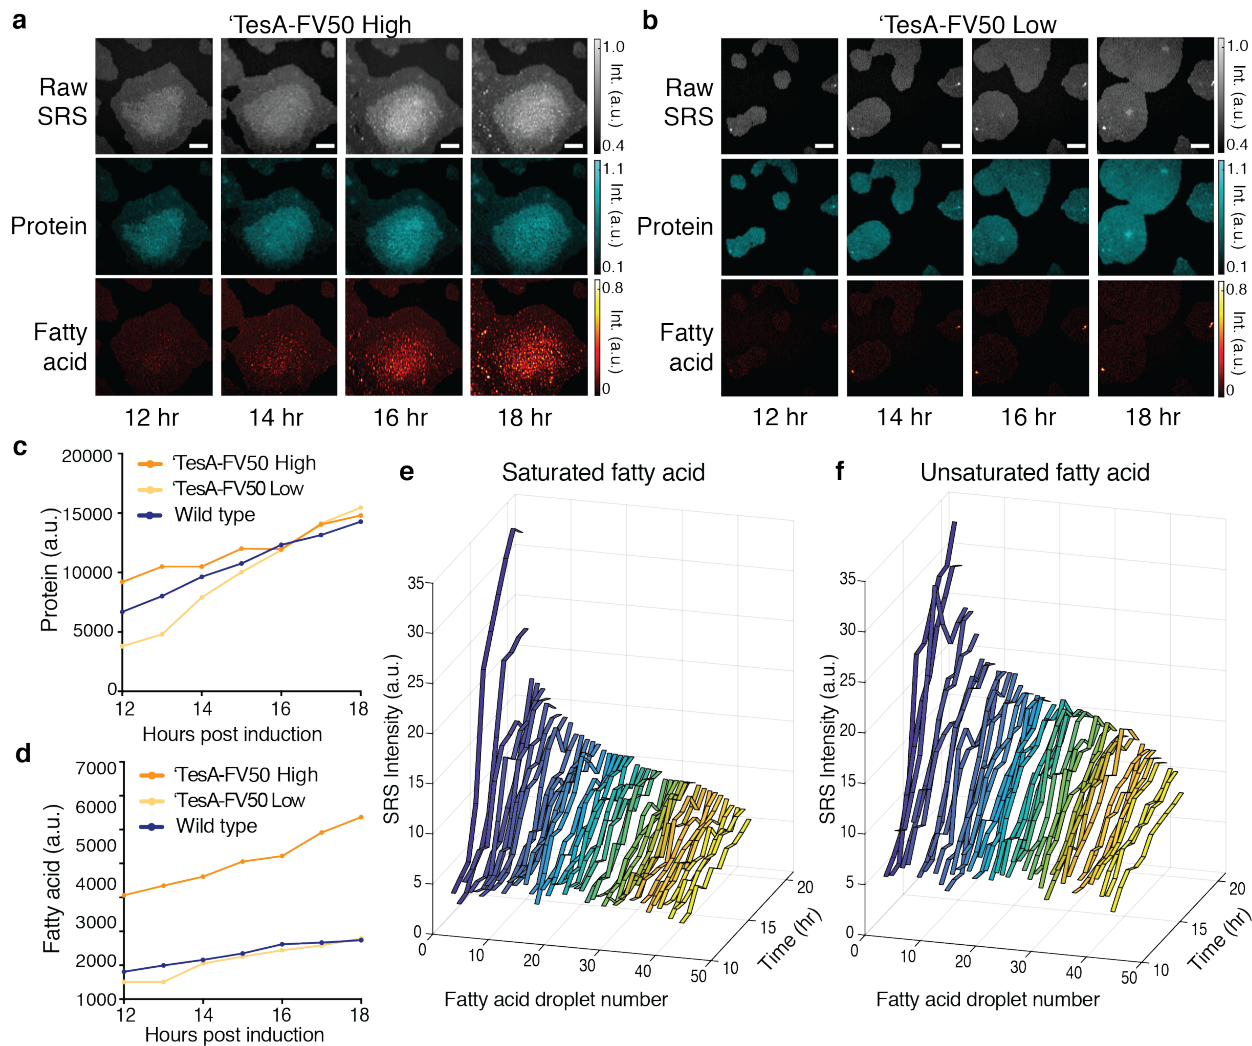

798  
799

800 **Figure 4. Longitudinal SRS imaging of production dynamics.** Time-lapse images of (a) a  
801 'TesA-FV50 high producing microcolony and (b) a 'TesA-FV50 low producing microcolony  
802 under the same conditions, shown with the raw SRS images (spectral summation of the SRS image  
803 stack) and chemical maps corresponding to protein and fatty acid content. Scale bars, 10  $\mu$ m.  
804 Quantification of (c) protein and (d) fatty acid over time from the microcolonies in (a-b and Fig.  
805 S11). (e) Saturated and (f) unsaturation content of individual droplets from the 'TesA-FV50 high  
806 microcolony shown in (a). Droplets are numbered in order of their final fatty acid levels and  
807 numbers are consistent between (e) and (f).

808  
809

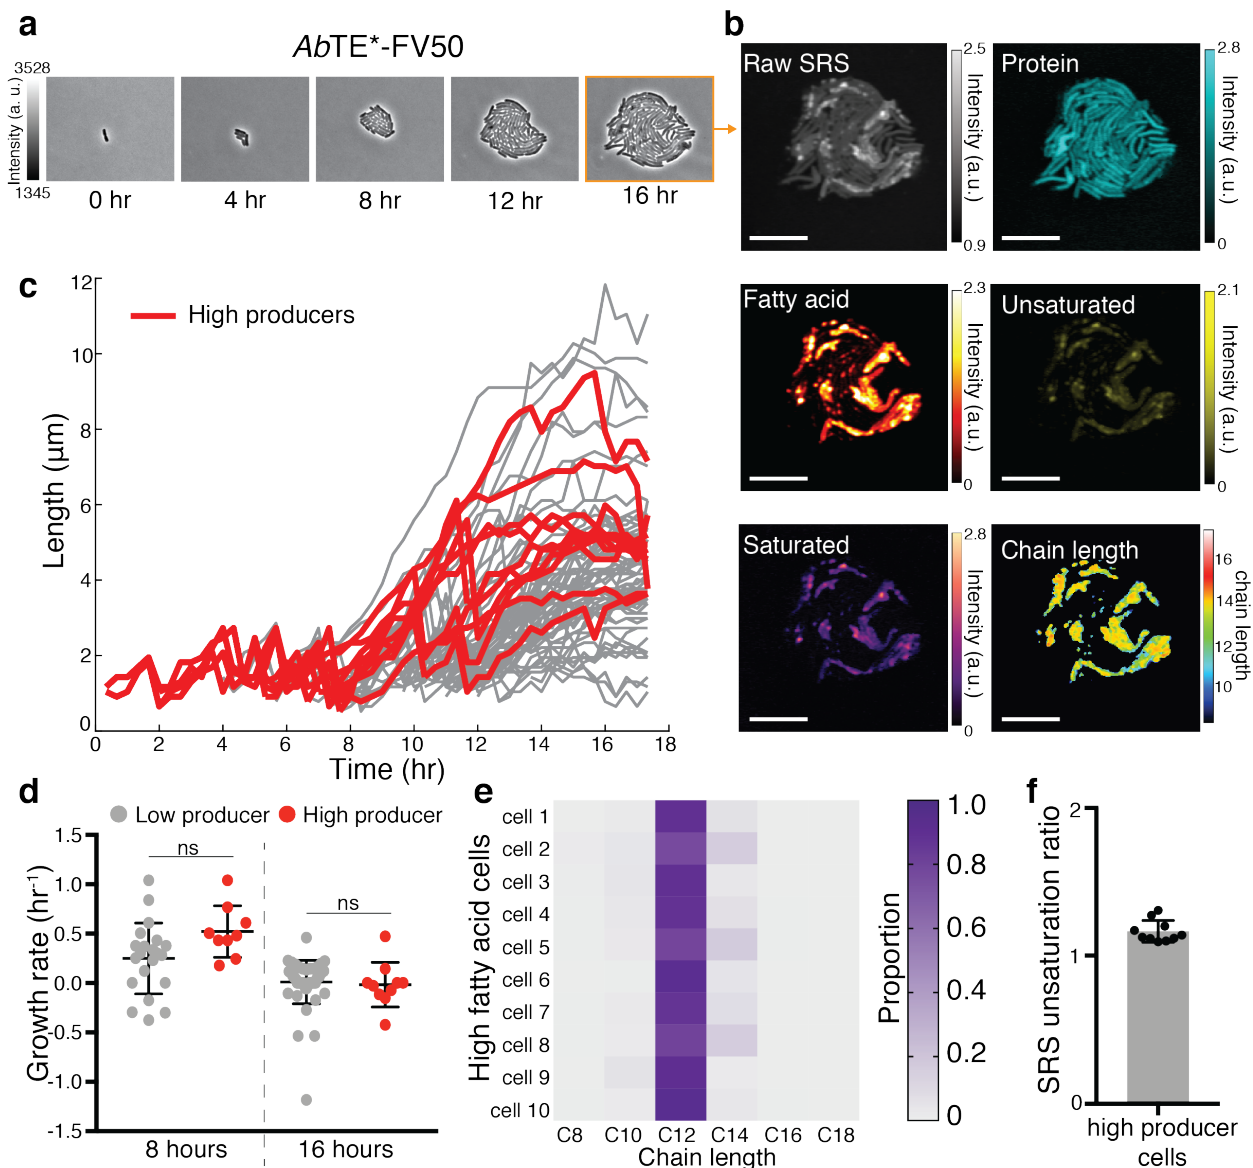

810  
 811 **Figure 5. Single cell growth-production relationship.** (a) Time-lapse phase contrast imaging of  
 812 an *AbTE\*-FV50* microcolony followed by (b) endpoint SRS imaging and spectral decomposition.  
 813 (c) Single-cell lengths as a function of time within the microcolony shown in (a-b), with high  
 814 producer trajectories highlighted in red ( $n = 68$  cells). Sharp decreases in length mark a cell  
 815 division. High producers are defined as the top 15% of producer cells (Fig. S16). (d) Growth rate  
 816 comparisons of high and low producer trajectories at 8 and 16 hours ( $p = 0.0507$  and  $p = 0.714$ ,  
 817 respectively; two tailed unpaired t-test). Growth rate is calculated from cell length data in (c) (see  
 818 methods). (e) Saturated chain length prediction of high producer cells. (f) Unsaturation ratio  
 819 (unsaturated/saturated) of high producer cells.

820

821 **Tables**

822

823 **Table 1.** List of plasmids used in this study.

824

| Plasmid                               | Origin | Overexpressed operon                                           | Resistance       | Reference                                                          |
|---------------------------------------|--------|----------------------------------------------------------------|------------------|--------------------------------------------------------------------|
| <b>pSS200</b>                         | pMB1   | P <sub>trc</sub> - <i>Abte</i> :G17R/A165R                     | Amp <sup>R</sup> | Sarria <i>et al.</i> (37)                                          |
| <b>pBbA5c-‘tesA-vhb50-8fadR</b>       | p15a   | P <sub>lacUV5</sub> -‘tesA-vhb50, P <sub>BAD</sub> -fadR       | Cm <sup>R</sup>  | Liu <i>et al.</i> (47)                                             |
| <b>pBbA5c-vhb50-8fadR</b>             | p15a   | P <sub>lacUV5</sub> -vhb50, P <sub>BAD</sub> -fadR             | Cm <sup>R</sup>  | This study                                                         |
| <b>pBbA5c-CpFatB1.2-M4-287</b>        | p15a   | P <sub>lacUV5</sub> - <i>CpfatB1.2-M4-287</i>                  | Cm <sup>R</sup>  | This study, mutant enzyme from Hernandez Lozada <i>et al.</i> (46) |
| <b>pBbA5c-‘tesA-sfGFP-vhb50-8fadR</b> | p15a   | P <sub>lacUV5</sub> -‘tesA-sfGFP-vhb50, P <sub>BAD</sub> -fadR | Cm <sup>R</sup>  | This study                                                         |
| <b>pSS200-sfGFP</b>                   | pMB1   | P <sub>trc</sub> - <i>Abte</i> :G17R/A165R-sfGFP               | Amp <sup>R</sup> | This study                                                         |
| <b>pBbE-ibpAB-k-mRFP1</b>             | ColeE1 | P <sub>ibpAB</sub> -mRFP1                                      | Kan <sup>R</sup> | This study, based on promoter from Ceroni <i>et al.</i> (53)       |

825

826 **Table 2.** List of *E. coli* strains used in this study.

827

| Strain                          | Relevant genotype                                                                                                                                   | Reference                   |
|---------------------------------|-----------------------------------------------------------------------------------------------------------------------------------------------------|-----------------------------|
| <b>BW25113 (wild type)</b>      | F <sup>-</sup> Δ( <i>araD-araB</i> )567 Δ <i>lacZ</i> 4787(:: <i>rrnB</i> -3) λ <sup>-</sup> <i>rph</i> -1 Δ( <i>rhaD-rhaB</i> )568 <i>hsdR</i> 514 | Baba <i>et al.</i> (71)     |
| <b>BW25113 Δ<i>fadE</i></b>     | <i>E. coli</i> BW25113 Δ <i>fadE</i> , cured from Keio collection                                                                                   | Baba <i>et al.</i> (71)     |
| <b>MG1655</b>                   | F <sup>-</sup> , λ <sup>-</sup> , <i>rph</i> -1                                                                                                     | Blattner <i>et al.</i> (77) |
| <b><i>AbTE</i>*</b>             | <i>E. coli</i> MG1655; pSS200                                                                                                                       | Sarria <i>et al.</i> (37)   |
| <b>‘<i>TesA-FV50</i></b>        | <i>E. coli</i> BW25113 Δ <i>fadE</i> ; pBbA5c-‘tesA-vhb50-8fadR                                                                                     | Liu <i>et al.</i> (47)      |
| <b><i>AbTE</i>*-<i>FV50</i></b> | <i>E. coli</i> MG1655; pBbA5c-vhb50-8fadR, pSS200                                                                                                   | This study                  |
| <b><i>CpFatB1</i>*</b>          | <i>E. coli</i> MG1655; pBbA5c-CpfatB1.2-M4-287                                                                                                      | This study                  |
| <b>‘<i>TesA-FV50-sfGFP</i></b>  | <i>E. coli</i> BW25113 Δ <i>fadE</i> ; pBbA5c-‘tesA-sfGFP-vhb50-8fadR                                                                               | This study                  |
| <b><i>AbTE</i>*-sfGFP-FV50</b>  | <i>E. coli</i> MG1655; pBbA5c-vhb50-8fadR, pSS200-sfGFP                                                                                             | This study                  |

828



## 829 References

- 830 1. Y. Liu, *et al.*, Biofuels for a sustainable future. *Cell* **184**, 1636–1647 (2021).
- 831 2. S. Y. Choi, *et al.*, Metabolic engineering for the synthesis of polyesters: A 100-year  
832 journey from polyhydroxyalkanoates to non-natural microbial polyesters. *Metab. Eng.* **58**,  
833 47–81 (2020).
- 834 3. M. Cao, M. Gao, M. Suástegui, Y. Mei, Z. Shao, Building microbial factories for the  
835 production of aromatic amino acid pathway derivatives: From commodity chemicals to  
836 plant-sourced natural products. *Metab. Eng.* **58**, 94–132 (2020).
- 837 4. T. U. Chae, *et al.*, Metabolic engineering for the production of dicarboxylic acids and  
838 diamines. *Metab. Eng.* **58**, 2–16 (2020).
- 839 5. S. Y. Lee, *et al.*, A comprehensive metabolic map for production of bio-based chemicals.  
840 *Nat. Catal.* **2**, 18–33 (2019).
- 841 6. M. B. Elowitz, A. J. Levine, E. D. Siggia, P. S. Swain, Stochastic gene expression in a  
842 single cell. *Science (80-. )*. **297**, 1183–1186 (2002).
- 843 7. D. J. Kiviet, *et al.*, Stochasticity of metabolism and growth at the single-cell level. *Nature*  
844 **514**, 376–379 (2014).
- 845 8. A. L. Heins, D. Weuster-Botz, Population heterogeneity in microbial bioprocesses: origin,  
846 analysis, mechanisms, and future perspectives. *Bioprocess Biosyst. Eng.* **41**, 889–916  
847 (2018).
- 848 9. P. Rugbjerg, N. Myling-Petersen, A. Porse, K. Sarup-Lytzen, M. O. A. Sommer, Diverse  
849 genetic error modes constrain large-scale bio-based production. *Nat. Commun.* **9** (2018).
- 850 10. P. Rugbjerg, A. S. B. Dyerberg, S. Quainoo, C. Munck, M. O. A. Sommer, Short and  
851 long-read ultra-deep sequencing profiles emerging heterogeneity across five platform  
852 *Escherichia coli* strains. *Metab. Eng.* **65**, 197–206 (2021).
- 853 11. J. P. Torella, *et al.*, Tailored fatty acid synthesis via dynamic control of fatty acid  
854 elongation. *Proc. Natl. Acad. Sci. U. S. A.* **110**, 11290–11295 (2013).
- 855 12. F. Zhang, *et al.*, Enhancing fatty acid production by the expression of the regulatory  
856 transcription factor FadR. *Metab. Eng.* **14**, 653–660 (2012).
- 857 13. Y. Cao, *et al.*, Production of free monounsaturated fatty acids by metabolically engineered  
858 *Escherichia coli*. *Biotechnol. Biofuels* **7**, 1–11 (2014).
- 859 14. Y. J. Choi, S. Y. Lee, Microbial production of short-chain alkanes. *Nature* **502**, 571–574  
860 (2013).
- 861 15. Q. Yan, B. F. Pflieger, Revisiting metabolic engineering strategies for microbial synthesis  
862 of oleochemicals. *Metab. Eng.* **58**, 35–46 (2020).
- 863 16. F. Delvigne, Q. Zune, A. R. Lara, W. Al-Soud, S. J. Sørensen, Metabolic variability in  
864 bioprocessing: Implications of microbial phenotypic heterogeneity. *Trends Biotechnol.* **32**,  
865 608–616 (2014).
- 866 17. F. Delvigne, P. Goffin, Microbial heterogeneity affects bioprocess robustness: Dynamic  
867 single-cell analysis contributes to understanding of microbial populations. *Biotechnol. J.*  
868 **9**, 61–72 (2014).
- 869 18. R. Takors, Scale-up of microbial processes: Impacts, tools and open questions. *J.*  
870 *Biotechnol.* **160**, 3–9 (2012).
- 871 19. J. Zhang, M. K. Jensen, J. D. Keasling, Development of biosensors and their application in  
872 metabolic engineering. *Curr. Opin. Chem. Biol.* **28**, 1–8 (2015).
- 873 20. F. Zhang, J. M. Carothers, J. D. Keasling, Design of a dynamic sensor-regulator system  
874 for production of chemicals and fuels derived from fatty acids. *Nat. Biotechnol.* **30**, 354–

- 875 359 (2012).
- 876 21. P. Xu, L. Li, F. Zhang, G. Stephanopoulos, M. Koffas, Improving fatty acids production  
877 by engineering dynamic pathway regulation and metabolic control. *Proc. Natl. Acad. Sci.*  
878 *U. S. A.* **111**, 11299–11304 (2014).
- 879 22. S. Y. Tang, P. C. Cirino, Design and application of a mevalonate-responsive regulatory  
880 protein. *Angew. Chemie - Int. Ed.* **50**, 1084–1086 (2011).
- 881 23. Y. Xiao, C. H. Bowen, D. Liu, F. Zhang, Exploiting nongenetic cell-to-cell variation for  
882 enhanced biosynthesis. *Nat. Chem. Biol.* **12**, 339–344 (2016).
- 883 24. C. Zhang, J. X. Cheng, Perspective: Coherent Raman scattering microscopy, the future is  
884 bright. *APL Photonics* **3** (2018).
- 885 25. F. Hu, L. Shi, W. Min, Biological imaging of chemical bonds by stimulated Raman  
886 scattering microscopy. *Nat. Methods* **16**, 830–842 (2019).
- 887 26. Y. Wakisaka, *et al.*, Probing the metabolic heterogeneity of live *Euglena gracilis* with  
888 stimulated Raman scattering microscopy. *Nat. Microbiol.* **1**, 8–11 (2016).
- 889 27. C. Zhang, J. Li, L. Lan, J. X. Cheng, Quantification of Lipid Metabolism in Living Cells  
890 through the Dynamics of Lipid Droplets Measured by Stimulated Raman Scattering  
891 Imaging. *Anal. Chem.* **89**, 4502–4507 (2017).
- 892 28. M. Zhang, *et al.*, Rapid Determination of Antimicrobial Susceptibility by Stimulated  
893 Raman Scattering Imaging of D2O Metabolic Incorporation in a Single Bacterium. *Adv.*  
894 *Sci.* **7**, 1–14 (2020).
- 895 29. H. Lin, *et al.*, Microsecond fingerprint stimulated Raman spectroscopic imaging by  
896 ultrafast tuning and spatial-spectral learning. *Nat. Commun.* **12**, 1–12 (2021).
- 897 30. J. Li, *et al.*, Lipid Desaturation Is a Metabolic Marker and Therapeutic Target of Ovarian  
898 Cancer Stem Cells. *Cell Stem Cell* **20**, 303-314.e5 (2017).
- 899 31. D. Fu, G. Holtom, C. Freudiger, X. Zhang, X. S. Xie, Hyperspectral imaging with  
900 stimulated Raman scattering by chirped femtosecond lasers. *J. Phys. Chem. B* **117**, 4634–  
901 40 (2013).
- 902 32. T. Hellerer, A. M. K. Enejder, A. Zumbusch, Spectral focusing: High spectral resolution  
903 spectroscopy with broad-bandwidth laser pulses. *Appl. Phys. Lett.* **85**, 25–27 (2004).
- 904 33. C.-S. Liao, *et al.*, Stimulated Raman spectroscopic imaging by microsecond delay-line  
905 tuning. *Optica* **3**, 1377–1380 (2016).
- 906 34. R. M. Lennen, B. F. Pflieger, Engineering *Escherichia coli* to synthesize free fatty acids.  
907 *Trends Biotechnol.* **30**, 659–667 (2012).
- 908 35. H. Cho, J. E. Cronan, Defective export of a periplasmic enzyme disrupts regulation of  
909 fatty acid synthesis. *J. Biol. Chem.* **270**, 4216–4219 (1995).
- 910 36. P. Jiang, J. E. Cronan, Inhibition of fatty acid synthesis in *Escherichia coli* in the absence  
911 of phospholipid synthesis and release of inhibition by thioesterase action. *J. Bacteriol.*  
912 **176**, 2814–2821 (1994).
- 913 37. S. Sarria, T. G. Bartholow, A. Verga, M. D. Burkart, P. Peralta-Yahya, Matching Protein  
914 Interfaces for Improved Medium-Chain Fatty Acid Production. *ACS Synth. Biol.* **7**, 1179–  
915 1187 (2018).
- 916 38. P. P. Peralta-Yahya, F. Zhang, S. B. Del Cardayre, J. D. Keasling, Microbial engineering  
917 for the production of advanced biofuels. *Nature* **488**, 320–328 (2012).
- 918 39. S. Sarria, N. S. Kruyer, P. Peralta-Yahya, Microbial synthesis of medium-chain chemicals  
919 from renewables. *Nat. Biotechnol.* **35**, 1158–1166 (2017).
- 920 40. K. Czamara, *et al.*, Raman spectroscopy of lipids: A review. *J. Raman Spectrosc.* **46**, 4–20

- 921 (2015).
- 922 41. R. J. Heath, C. O. Rock, The Claisen condensation in biology. *Nat. Prod. Rep.* **19**, 581–  
923 596 (2002).
- 924 42. A. Ruppe, J. M. Fox, Analysis of Interdependent Kinetic Controls of Fatty Acid  
925 Synthases. *ACS Catal.* **8**, 11722–11734 (2018).
- 926 43. Y. C. Lo, S. C. Lin, J. F. Shaw, Y. C. Liaw, Crystal structure of Escherichia coli  
927 thioesterase I/protease I/lysophospholipase L1: Consensus sequence blocks constitute the  
928 catalytic center of SGNH-hydrolases through a conserved hydrogen bond network. *J. Mol.*  
929 *Biol.* **330**, 539–551 (2003).
- 930 44. M. J. Grisewood, *et al.*, Computational Redesign of Acyl-ACP Thioesterase with  
931 Improved Selectivity toward Medium-Chain-Length Fatty Acids. *ACS Catal.* **7**, 3837–  
932 3849 (2017).
- 933 45. X. Deng, *et al.*, Structure-guided reshaping of the acyl binding pocket of ‘TesA  
934 thioesterase enhances octanoic acid production in E. coli. *Metab. Eng.* **61**, 24–32 (2020).
- 935 46. N. J. Hernández Lozada, *et al.*, Highly Active C 8 -Acyl-ACP Thioesterase Variant  
936 Isolated by a Synthetic Selection Strategy. *ACS Synth. Biol.* **7**, 2205–2215 (2018).
- 937 47. D. Liu, N. Wan, F. Zhang, Y. J. Tang, S. G. Wu, Enhancing fatty acid production in  
938 Escherichia coli by Vitreoscilla hemoglobin overexpression. *Biotechnol. Bioeng.* **114**,  
939 463–467 (2017).
- 940 48. P. Rugbjerg, M. O. A. Sommer, Overcoming genetic heterogeneity in industrial  
941 fermentations. *Nat. Biotechnol.* **37**, 869–876 (2019).
- 942 49. J. F. Huang, *et al.*, Systematic Analysis of Bottlenecks in a Multibranched and Multilevel  
943 Regulated Pathway: The Molecular Fundamentals of l -Methionine Biosynthesis in  
944 Escherichia coli. *ACS Synth. Biol.* **7**, 2577–2589 (2018).
- 945 50. R. M. Lennen, *et al.*, Membrane stresses induced by overproduction of free fatty acids in  
946 Escherichia coli. *Appl. Environ. Microbiol.* **77**, 8114–8128 (2011).
- 947 51. H. J. Lee, *et al.*, Label-Free Vibrational Spectroscopic Imaging of Neuronal Membrane  
948 Potential. *J. Phys. Chem. Lett.* **8**, 1932–1936 (2017).
- 949 52. L. Wei, *et al.*, Live-Cell Bioorthogonal Chemical Imaging: Stimulated Raman Scattering  
950 Microscopy of Vibrational Probes. *Acc. Chem. Res.* **49**, 1494–1502 (2016).
- 951 53. F. Ceroni, *et al.*, Burden-driven feedback control of gene expression. *Nat. Methods* **15**,  
952 387–393 (2018).
- 953 54. R. J. Heath, C. O. Rock, Regulation of fatty acid elongation and initiation by acyl-acyl  
954 carrier protein in Escherichia coli. *J. Biol. Chem.* **271**, 1833–1836 (1996).
- 955 55. M. S. Davis, J. Cronan, Inhibition of Escherichia coli acetyl coenzyme A carboxylase by  
956 acyl-acyl carrier protein. *J. Bacteriol.* **183**, 1499–1503 (2001).
- 957 56. L. My, N. Ghandour Achkar, J. P. Viala, E. Bouveret, Reassessment of the Genetic  
958 Regulation of Fatty Acid Synthesis in Escherichia coli: Global Positive Control by the  
959 Functional Dual Regulator FadR. *J. Bacteriol.* **197**, 1862–1872 (2015).
- 960 57. Y. Feng, J. E. Cronan, Complex binding of the FabR repressor of bacterial unsaturated  
961 fatty acid biosynthesis to its cognate promoters. *Mol. Microbiol.* **80**, 195–218 (2011).
- 962 58. M. J. Noga, *et al.*, Posttranslational control of plsB is sufficient to coordinate membrane  
963 synthesis with growth in escherichia coli. *MBio* **11**, 1–15 (2020).
- 964 59. B. R. Glick, Metabolic load and heterologous gene expression. *Biotechnol. Adv.* **13**, 247–  
965 261 (1995).
- 966 60. V. J. J. Martin, D. J. Pitera, S. T. Withers, J. D. Newman, J. D. Keasling, Engineering a

- 967 mevalonate pathway in *Escherichia coli* for production of terpenoids. *Nat. Biotechnol.* **21**,  
968 796–802 (2003).
- 969 61. D. Liu, A. A. Mannan, Y. Han, D. A. Oyarzún, F. Zhang, Dynamic metabolic control:  
970 towards precision engineering of metabolism. *J. Ind. Microbiol. Biotechnol.* **45**, 535–543  
971 (2018).
- 972 62. O. M. O’Connor, R. N. Alnahhas, J. B. Lugagne, M. J. Dunlop, DeLTA 2.0: A deep  
973 learning pipeline for quantifying single-cell spatial and temporal dynamics. *PLoS Comput.*  
974 *Biol.* **18**, 1–18 (2022).
- 975 63. Y. Feng, J. E. Cronan, *Escherichia coli* unsaturated fatty acid synthesis. Complex  
976 transcription of the *fabA* gene and in vivo identification of the essential reaction catalyzed  
977 by FabB. *J. Biol. Chem.* **284**, 29526–29535 (2009).
- 978 64. D. Zhang, M. N. Slipchenko, J. X. Cheng, Highly sensitive vibrational imaging by  
979 femtosecond pulse stimulated raman loss. *J. Phys. Chem. Lett.* **2**, 1248–1253 (2011).
- 980 65. Y. Fu, H. Wang, R. Shi, J.-X. Cheng, Characterization of photodamage in coherent anti-  
981 Stokes Raman scattering microscopy. *Opt. Express* **14**, 3942 (2006).
- 982 66. A. Podwin, W. Kubicki, J. A. Dziuban, Study of the behavior of *Euglena viridis*, *Euglena*  
983 *gracilis* and *Lepadella patella* cultured in all-glass microaquarium. *Biomed. Microdevices*  
984 **19** (2017).
- 985 67. C. J. Hartline, A. C. Schmitz, Y. Han, F. Zhang, Dynamic control in metabolic  
986 engineering: Theories, tools, and applications. *Metab. Eng.* **63**, 126–140 (2021).
- 987 68. E. M. Zhao, *et al.*, Optogenetic regulation of engineered cellular metabolism for microbial  
988 chemical production. *Nature* **555**, 683–687 (2018).
- 989 69. Y. Ozeki, F. Dake, S. Kajiyama, K. Fukui, K. Itoh, Analysis and experimental assessment  
990 of the sensitivity of stimulated Raman scattering microscopy. *Opt. Express* **17**, 3651–3658  
991 (2009).
- 992 70. N. Nitta, *et al.*, Raman image-activated cell sorting. *Nat. Commun.* **11**, 1–16 (2020).
- 993 71. T. Baba, *et al.*, Construction of *Escherichia coli* K-12 in-frame, single-gene knockout  
994 mutants: The Keio collection. *Mol. Syst. Biol.* **2** (2006).
- 995 72. K. A. Datsenko, B. L. Wanner, One-step inactivation of chromosomal genes in  
996 *Escherichia coli* K-12 using PCR products. *Proc. Natl. Acad. Sci. U. S. A.* **97**, 6640–6645  
997 (2000).
- 998 73. C. Engler, R. Kandzia, S. Marillonnet, A one pot, one step, precision cloning method with  
999 high throughput capability. *PLoS One* **3**, e3647 (2008).
- 1000 74. J. C. Anderson, *et al.*, BglBricks: A flexible standard for biological part assembly. *J. Biol.*  
1001 *Eng.* **4**, 1–12 (2010).
- 1002 75. M. N. Slipchenko, R. A. Oglesbee, D. Zhang, W. Wu, J. X. Cheng, Heterodyne detected  
1003 nonlinear optical imaging in a lock-in free manner. *J. Biophotonics* **5**, 801–807 (2012).
- 1004 76. A. E. Carpenter, *et al.*, CellProfiler: Image analysis software for identifying and  
1005 quantifying cell phenotypes. *Genome Biol.* **7** (2006).
- 1006 77. F. R. Blattner, *et al.*, The complete genome sequence of *Escherichia coli* K-12. *Science*  
1007 (80-). **277**, 1453–1462 (1997).
- 1008
- 1009

1010 SUPPLEMENTARY INFORMATION

1011

1012 Supplementary Figures

1013

1014

1015

1016

1017

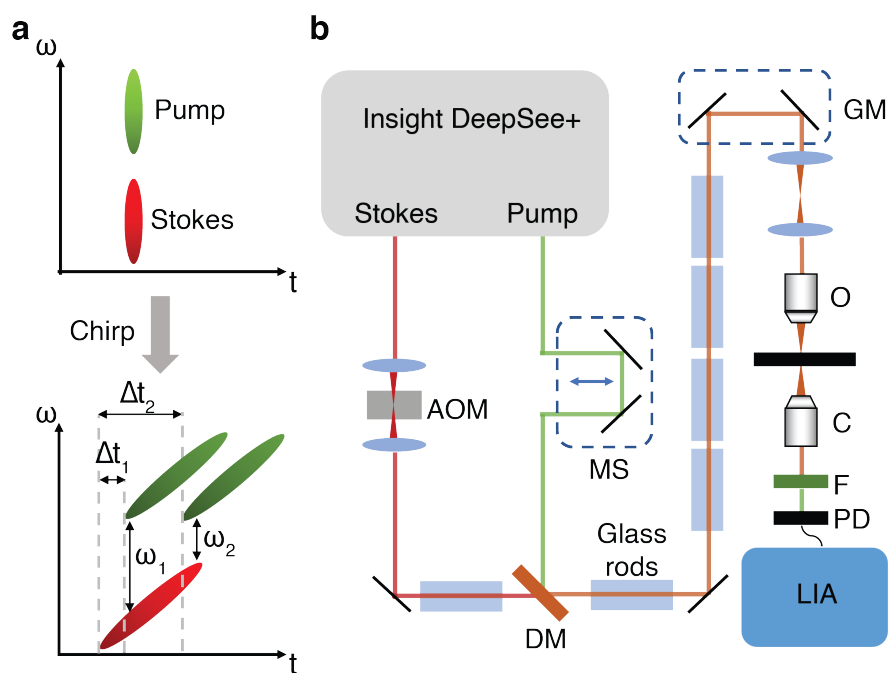

1018

1019

1020 **Figure S1.** Hyperspectral SRS setup. **(a)** Concept of hyperspectral SRS using spectral focusing.

1021 The pump and Stokes lasers are linearly chirped by high dispersion glass rods to temporally

1022 separate the spectral components. Each temporal delay between the two pulses corresponds to a

1023 Raman vibrational mode. **(b)** Optical setup. AOM, acousto-optic modulator; MS, motorized stage;

1024 DM, dichroic mirror; GM, galvo mirrors; O, objective; C, condenser; F, filter; PD, photodiode;

1025 LIA, lock-in amplifier.

1026

1027

1028  
1029  
1030

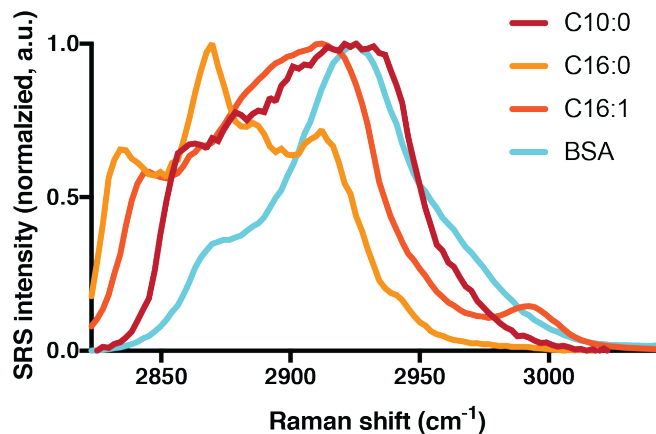

1031  
1032  
1033  
1034  
1035  
1036  
1037  
1038  
1039  
1040  
1041  
1042

**Figure S2.** SRS spectra of pure standards used to analyze hyperspectral images to produce chemical maps. (BSA: bovine serum albumin, C10:0: decanoic acid, C16:0: palmitic acid, C16:1: palmitoleic acid).

Raw SRS images

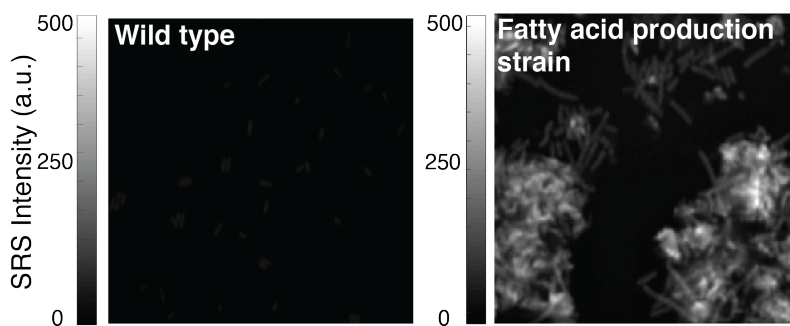

1043  
1044  
1045  
1046  
1047

**Figure S3.** Raw SRS images shown in Fig. 1c of wild type and a strain overexpressing a cytosolic thioesterase (*AbTE\**), but with both images scaled with the same color axis for direct comparison.

1048  
1049

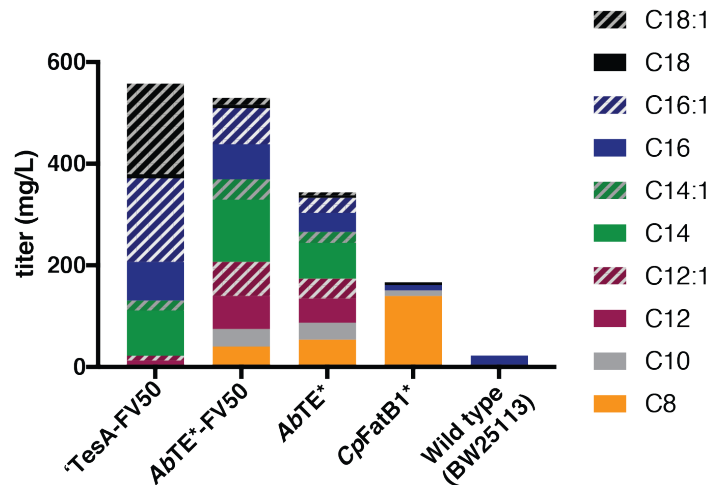

1050  
1051  
1052  
1053  
1054

**Figure S4.** Fatty acid production quantification for strains in this study. GC-MS quantified fatty acid production data for each strain. Cells were grown 24 hours post thioesterase induction in liquid culture. For chain length prediction, these exact cultures were taken for SRS imaging at the same timepoint.

1055

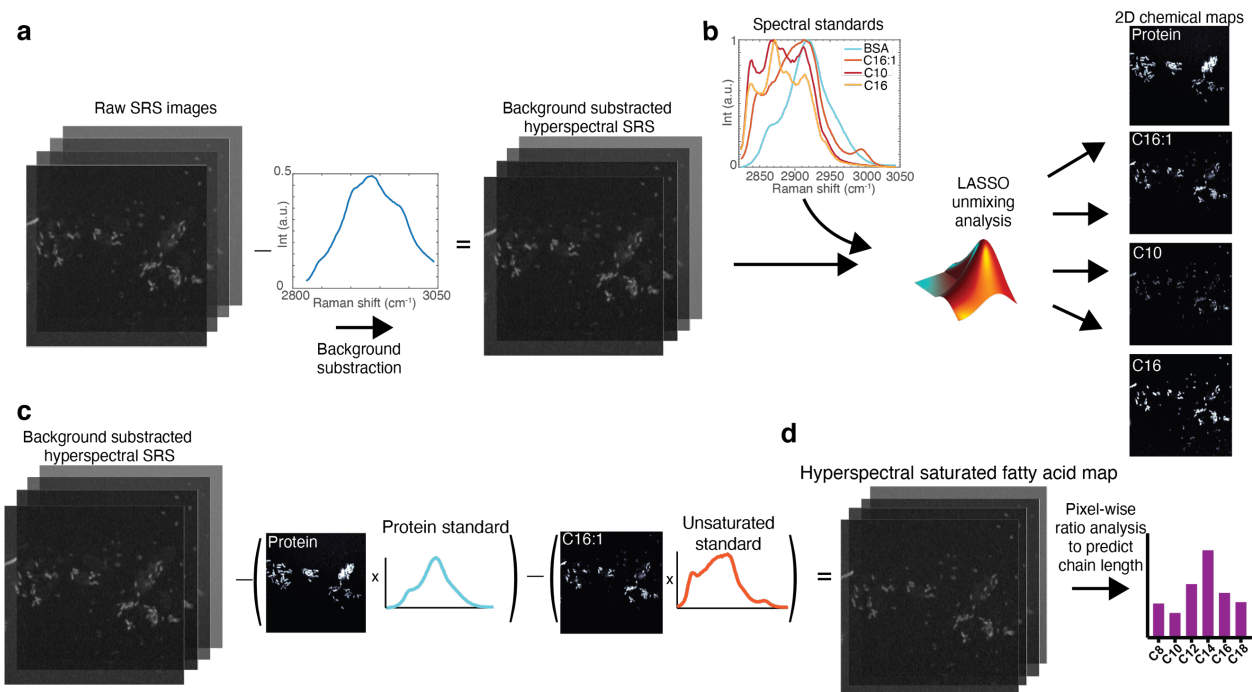

1056

1057

1058 **Figure S5.** Analysis workflow for chain length prediction from hyperspectral SRS images. **(a)**

1059 Raw SRS images are first background subtracted. **(b)** Background subtracted images are unmixed

1060 using chemical standards. Protein, BSA; unsaturated fatty acid, C16:1; medium chain fatty acid,

1061 C10; and long chain fatty acid, C16. C10 and C16 maps are used to represent a mixture of saturated

1062 fatty acids. **(c)** Protein and unsaturated fatty acid maps are multiplied by their respective standard

1063 spectra and subtracted from the background-subtracted hyperspectral image to produce a three-

1064 dimensional saturated fatty acid map. **(d)** Ratio analysis is performed on each pixel to calculate

1065 chain length and weighted by raw intensity to predict chain length distribution of the field of view.

1066



1067

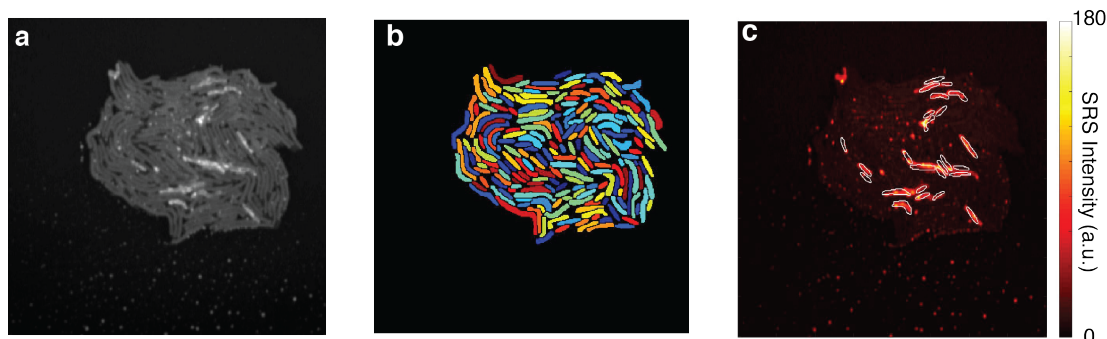

1068

1069

1070

1071

1072

1073

1074

1075

**Figure S6.** Single cell segmentation of a microcolony. **(a)** Raw SRS images are used to segment microcolonies to perform single cell analysis shown in Fig. 3c. **(b)** Segmentation of microcolony in (a). **(c)** Segmentation of the top 25 highest producing cells overlaid on the fatty acid map of the microcolony.

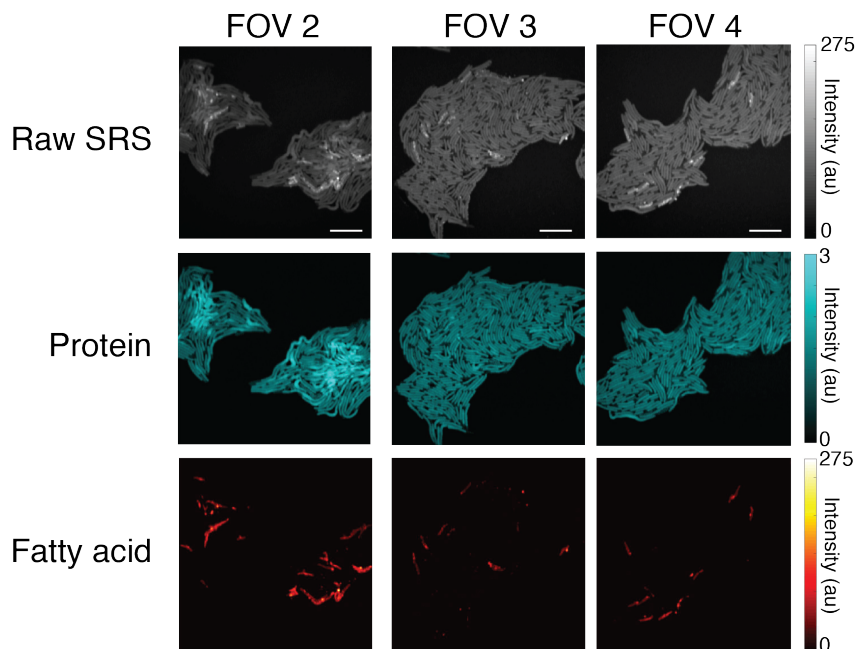

1076

1077

1078

1079

1080

1081

1082

1083

**Figure S7.** Intra-colony heterogeneity of the *AbTE\** strain. **(a)** Three additional fields of view (FOV) of the *AbTE\**-FV50 strain shown in Fig. 3b. Raw SRS, protein, and fatty acid chemical maps are shown for all. Scale bars, 10  $\mu$ m.

1084

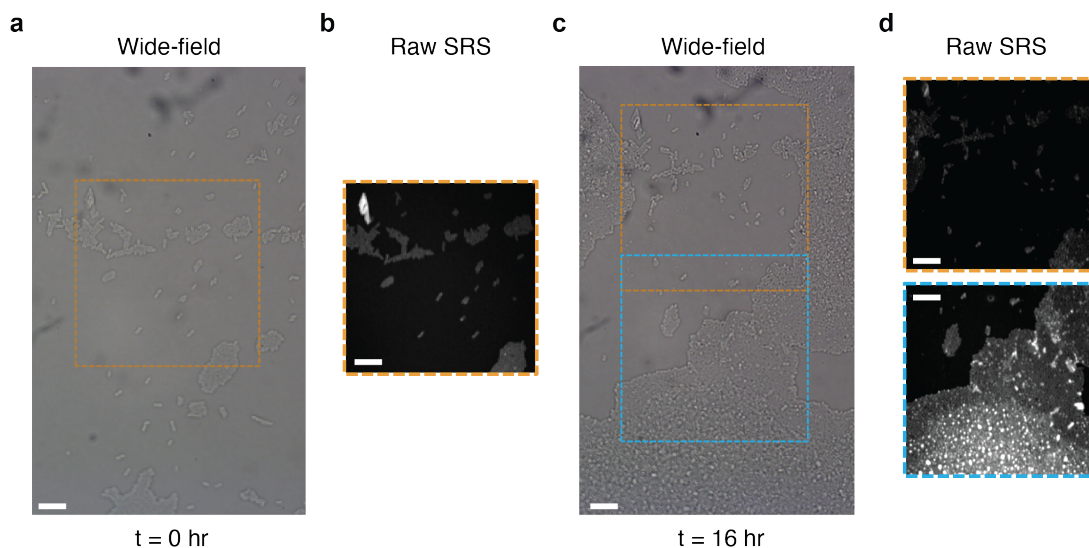

1085

1086

1087 **Figure S8.** Testing photodamage of live *E. coli* cells. (a) Wide-field transmission image of *E. coli*  
1088 cells at the start of the cell incubation ( $t = 0$  hr). (b) Hyperspectral SRS image of the region  
1089 highlighted with a yellow rectangle in (a). (c) Wide-field transmission image of the same field of  
1090 view after incubation ( $t = 16$  hr). (d) Hyperspectral SRS images of the previously scanned region  
1091 (yellow rectangle in (c)) and an adjacent region without previous SRS laser exposure (blue  
1092 rectangle in (c)). Scale bars,  $10 \mu\text{m}$ .

1093

1094

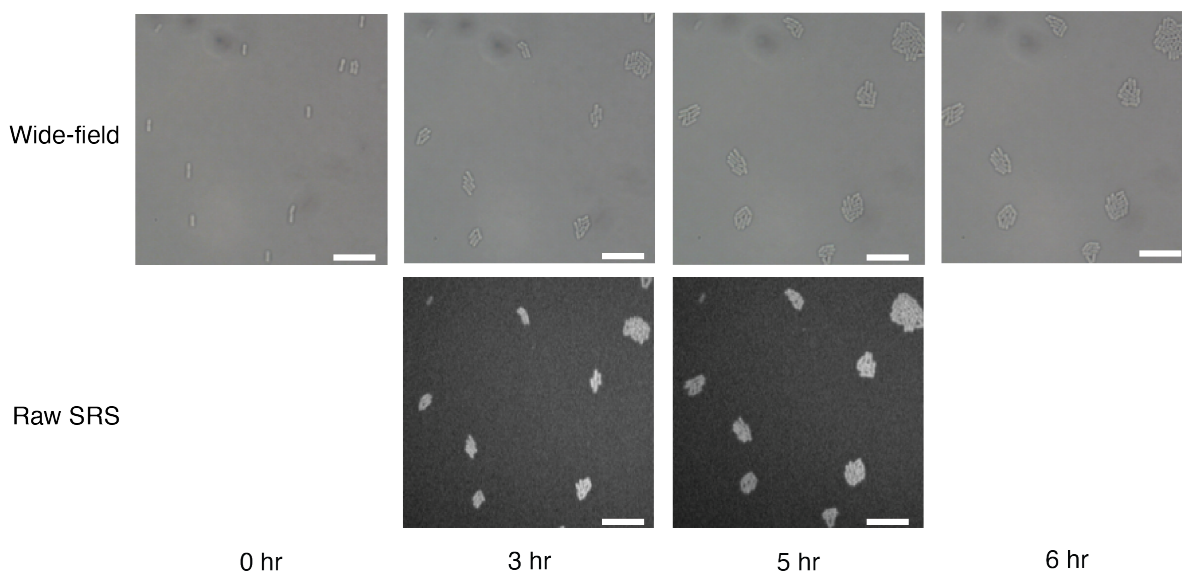

1095

1096

1097 **Figure S9.** Optimized SRS laser powers enable live cell imaging of *E. coli*. Wide-field  
1098 transmission image of *E. coli*, with raw hyperspectral SRS images of the same region for the  $t = 3$   
1099 and  $5$  hr timepoints. Spectral summation is shown. Scale bars,  $10 \mu\text{m}$ .

1100

1101

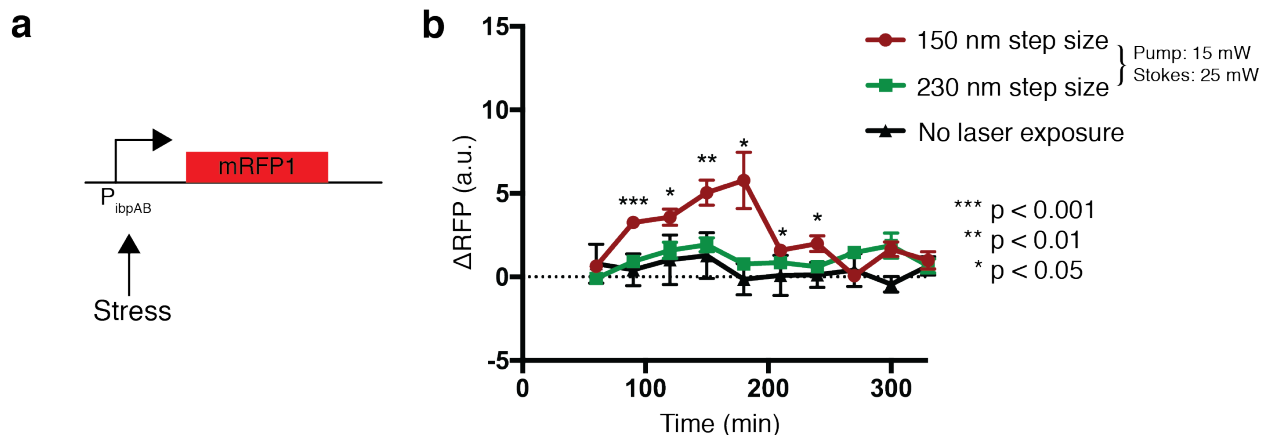

1102  
1103 **Figure S10.** Stress response of longitudinal SRS imaging conditions. **(a)** Schematic of stress  
1104 reporter,  $P_{ibpAB}$ , driving expression of mRFP1. **(b)** Fluorescent response of cells containing the  
1105 reporter after SRS exposure. Low power SRS (15mW pump and 25 mW Stokes) was tested using  
1106 steps sizes of 150nm and 230nm. P-values compare 150nm step size to no laser exposure ( $n = 9$ ;  
1107 two tailed unpaired t-test). Error bars show standard error of the mean.  
1108  
1109  
1110

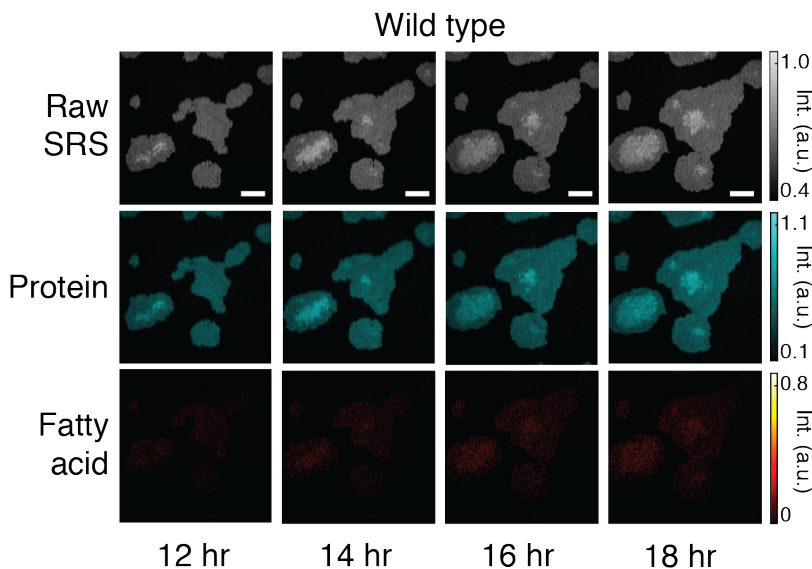

1111  
1112 **Figure S11.** Time-lapse images of a wild type control strain, shown with the raw SRS images  
1113 (spectral summation of the SRS image stack) and chemical maps corresponding to protein and  
1114 fatty acid content.  
1115

1116

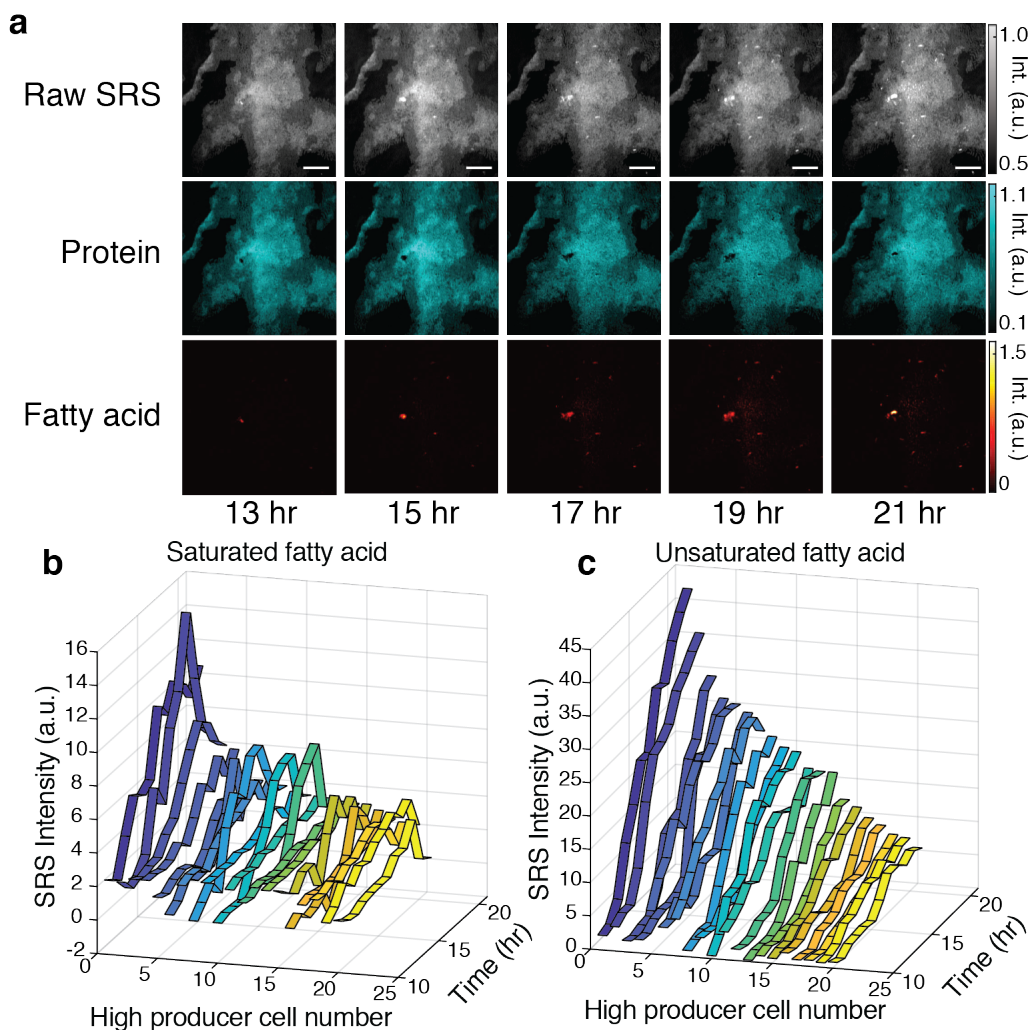

1117  
1118  
1119  
1120  
1121  
1122

**Figure S12.** Time-lapse images of fatty acid production in the *AbTE\**-FV50 strain. **(a)** Raw SRS images, protein, and fatty acid chemical maps are shown. Time values represent time grown on the agarose pad after IPTG induction. Scale bars, 10 µm. **(b)** Saturated and **(c)** unsaturated content of high producer single cells from the time-lapse images in **(a)**.

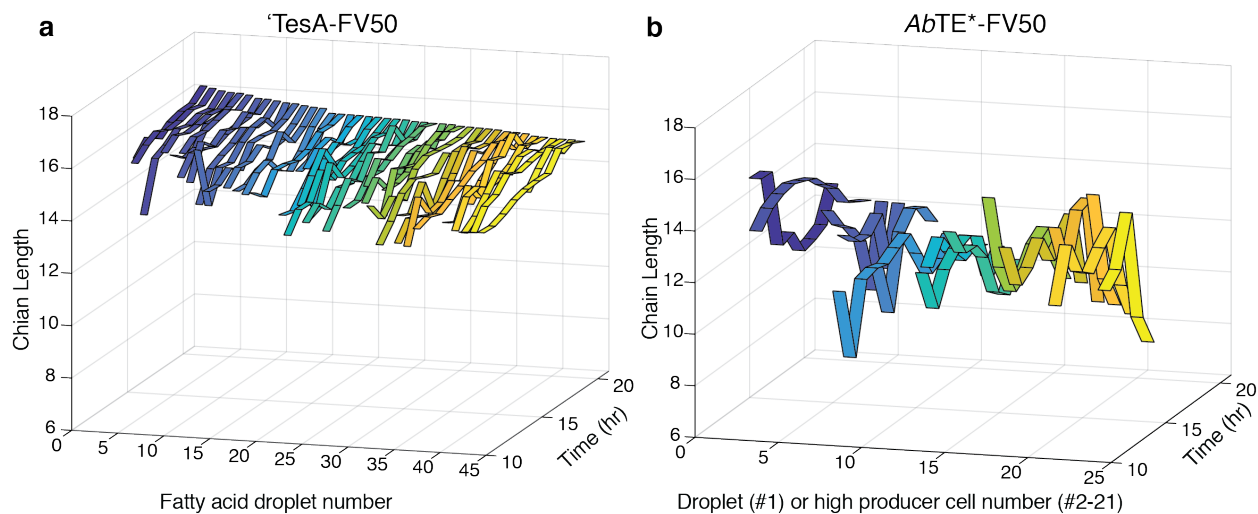

1123  
1124  
1125  
1126  
1127  
1128

**Figure S13. (a)** Longitudinal chain length predictions of droplets from the 'TesA-FV50 high microcolony from Fig. 4a. **(b)** Longitudinal chain length predictions of the large droplet (ribbon #1) and high producing cells (ribbons #2-21) in the *AbTE\**-FV50 microcolony from Fig. S12.

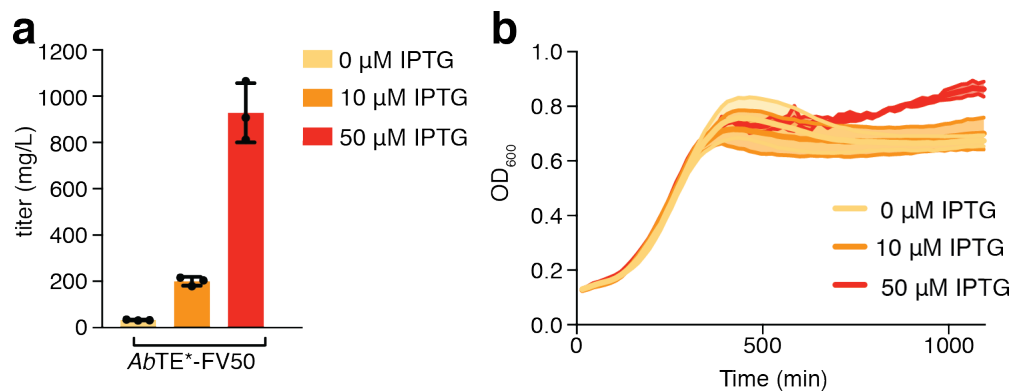

1129  
1130 **Figure S14. (a)** GC-MS quantification of fatty acid production and **(b)** growth of *AbTE\*-FV50*  
1131 at varying IPTG induction levels (n = 3). Error bars, standard deviation.

1132  
1133

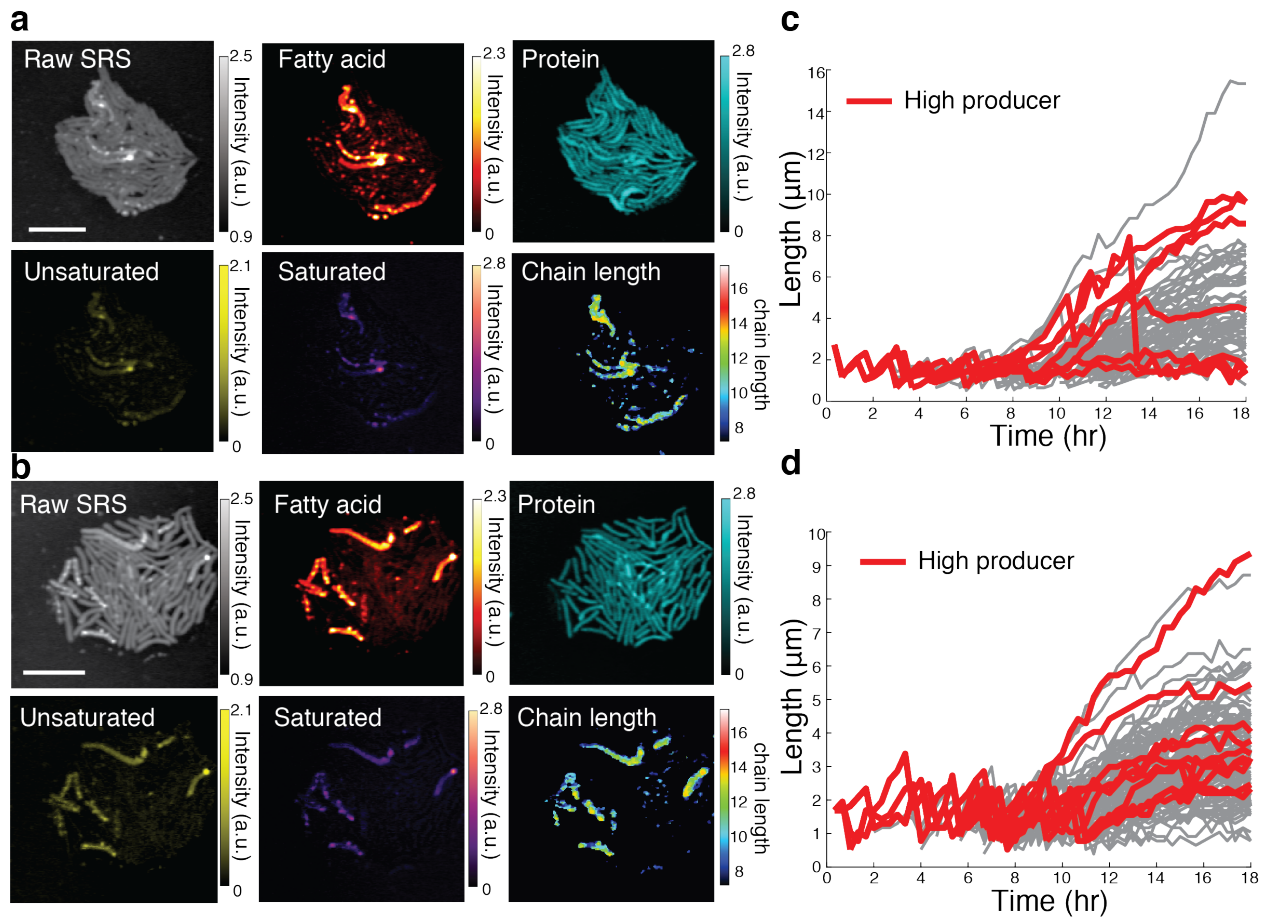

1134  
1135  
1136  
1137  
1138  
1139

**Figure S15.** (a-b) Endpoint SRS imaging and spectral decomposition of *AbTE\*-FV50* microcolonies tracked with time-lapse phase contrast imaging. (c-d) Single-cell lengths of individual cells in (a-b), with high producer trajectories (top 15%) highlighted in red.

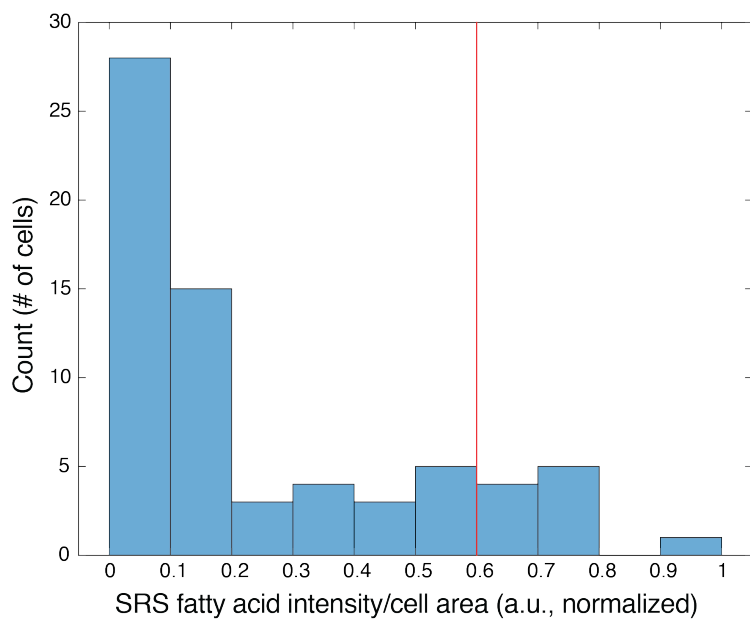

1140  
1141 **Figure S16.** Endpoint fatty acid distribution of the *AbTE*\*-FV50 microcolony in Fig. 5. The red  
1142 line indicates the threshold set to define high producer cells.



1143 **Supplementary Movies**

1144

1145 **Movie S1.** Time-lapse wide-field transmission images of the wild type strain during the live cell  
1146 SRS imaging shown in Fig. 3c. The white box indicates the SRS imaging region.

1147

1148 **Movie S2.** Time-lapse phase contrast images of the *AbTE\**-FV50 microcolony from Fig. 5.

1149

1150 **Movie S3.** Time-lapse phase contrast images of the *AbTE\**-FV50 microcolony from Fig. S15a.

1151

1152 **Movie S4.** Time-lapse phase contrast images of the *AbTE\**-FV50 microcolony from Fig. S15b.

1153

1154 **Movie S5.** Manually segmented droplets of the 'TesA-FV50 strain used for compositional tracking  
1155 in Fig. 4e-f and Fig. S13a.

1156

1157 **Movie S6.** Manually segmented droplets of the *AbTE\**-FV50 strain used for compositional  
1158 tracking in Fig. S12b-c and Fig. S13b.

1159
